**Classification:** Biological Sciences, Population Biology

# A personalized antibody score for predicting individual COVID-19 vaccine-elicited antibody levels from basic demographic and health information

## Authors:

Naotoshi Nakamura<sup>1,†</sup>, Hyeongki Park<sup>1,†</sup>, Kwang Su Kim<sup>1,2,4,†</sup>, Yoshitaka Sato<sup>3</sup>, Yong Dam Jeong<sup>1,4</sup>, Shoya Iwanami<sup>1</sup>, Yasuhisa Fujita<sup>1</sup>, Tianchen Zhao<sup>5</sup>, Yuta Tani<sup>6</sup>, Yoshitaka Nishikawa<sup>7</sup>, Chika Yamamoto<sup>5</sup>, Yurie Kobashi<sup>5,7</sup>, Takeshi Kawamura<sup>8,9</sup>, Akira Sugiyama<sup>8</sup>, Aya Nakayama<sup>8</sup>, Yudai Kaneko<sup>9,10</sup>, Kazuyuki Aihara<sup>11</sup>, Shingo Iwami<sup>1,12,13,14,15,16\*</sup> and Masaharu Tsubokura<sup>5,7,17,\*</sup>

## Affiliations:

<sup>1</sup>interdisciplinary Biology Laboratory (iBLab), Division of Natural Science, Graduate School of Science, Nagoya University, Nagoya, Japan. <sup>2</sup>Department of Science System Simulation, Pukyong National University, Busan, South Korea. <sup>3</sup>Department of Virology, Nagoya University Graduate School of Medicine, Nagoya, Japan. <sup>4</sup>Department of Mathematics, Pusan National University, Busan, South Korea. <sup>5</sup>Department of Radiation Health Management, Fukushima Medical University School of Medicine, Fukushima, Japan. <sup>6</sup>Medical Governance Research Institute, Tokyo, Japan. <sup>7</sup>Department of General Internal Medicine, Hirata Central Hospital, Fukushima, Japan. <sup>8</sup>Proteomics Laboratory, Isotope Science Center, The University of Tokyo, Tokyo, Japan. <sup>9</sup>Laboratory for Systems Biology and Medicine, Research Center for Advanced Science and Technology, The University of Tokyo, Tokyo, Japan. <sup>10</sup>Medical & Biological Laboratories Co., Ltd., Tokyo, Japan. <sup>11</sup>International Research Center for Neurointelligence, The University of Tokyo Institutes for Advanced Study, The University of Tokyo, Tokyo, Japan. <sup>12</sup>Institute of Mathematics for Industry, Kyushu University, Fukuoka, Japan. <sup>13</sup>Institute for the Advanced Study of Human Biology (ASHBi), Kyoto University, Kyoto, Japan. <sup>14</sup>Interdisciplinary Theoretical and Mathematical Sciences Program (iTHEMS), RIKEN, Saitama, Japan. <sup>15</sup>NEXT-Ganken

NOTE: This preprint reports new research that has not been certified by peer review and should not be used to guide clinical practice.

Program, Japanese Foundation for Cancer Research (JFCR), Tokyo, Japan.

<sup>16</sup>Science Groove Inc., Fukuoka, Japan. <sup>17</sup>Minamisoma Municipal General Hospital, Fukushima, Japan.

†These authors contributed equally to this study.

\*To whom correspondence may be addressed.

Email: [iwami.iblab@bio.nagoya-u.ac.jp](mailto:iwami.iblab@bio.nagoya-u.ac.jp) (S.I.) and [tsubo-m@fmu.ac.jp](mailto:tsubo-m@fmu.ac.jp) (M.T.)

## 1 **Abstract (248/250)**

2           Antibody titers wane after two-dose COVID-19 vaccinations, but individual variation in  
3 vaccine-elicited antibody dynamics remains to be explored. Here, we created a personalized  
4 antibody score that enables individuals to infer their antibody status by use of a simple calculation.  
5 We recently developed a mathematical model of B cell differentiation to accurately interpolate the  
6 longitudinal data from a community-based cohort in Fukushima, Japan, which consists of 2,159  
7 individuals who underwent serum sampling two or three times after a two-dose vaccination with  
8 either BNT162b2 or mRNA-1273. Using the individually reconstructed time course of the vaccine-  
9 elicited antibody response, we first elucidated individual background factors that contributed to  
10 the main features of antibody dynamics, i.e., the peak, the duration, and the area under the curve.  
11 We found that increasing age was a negative factor and a longer interval between the two doses  
12 was a positive factor for individual antibody level. We also found that the presence of underlying  
13 disease and the use of medication affected antibody levels negatively, whereas the presence of  
14 adverse reactions upon vaccination affected antibody levels positively. We then applied to these  
15 factors a recently proposed computational method to optimally fit clinical scores, which resulted  
16 in an integer-based score that can be used to evaluate the antibody status of individuals from  
17 their basic demographic and health information. This score can be easily calculated by individuals  
18 themselves or by medical practitioners. There is a potential usefulness of this score for identifying  
19 vulnerable populations and encouraging them to get booster vaccinations.

## 20 **Significance statement (117/120)**

21 Different individuals show different antibody titers even after the same COVID-19  
22 vaccinations, making some individuals more prone to breakthrough infections than others. Such  
23 variability remains to be clarified. Here we used mathematical modeling to reconstruct individual  
24 post-vaccination antibody dynamics from a cohort of 2,159 individuals in Fukushima, Japan.  
25 Machine learning identified several positive and negative factors affecting individual antibody  
26 titers. Positive factors included adverse reactions after vaccinations and a longer interval between  
27 two vaccinations. Negative factors included age, underlying medical conditions, and medications.  
28 We combined these factors and developed an “antibody score” to estimate individual antibody  
29 dynamics from basic demographic and health information. This score can help to guide individual  
30 decision-making about taking further precautions against COVID-19.

31

## 32 **Keywords:**

33 COVID-19, Vaccine-elicited antibody response, Feature engineering, Mathematical model,  
34 Feature importance

35

36 \body

## 37 **Text**

38           The ongoing COVID-19 pandemic has caused more than 500 million cases and 6 million  
39 confirmed deaths worldwide. The current COVID-19 vaccines, which became available in late  
40 2020 to early 2021, have helped vaccine recipients acquire immunity against SARS-CoV-2 and  
41 reduce their likelihood of infection and hospitalization (1, 2).

42           In the case of two-dose mRNA-based vaccines such as BNT162b2 and mRNA-1273,  
43 antibody titers, on average, reach a peak around two weeks after the second vaccination and  
44 decline thereafter. However, explanation of the individual variability in vaccine-elicited antibody  
45 dynamics has remained elusive. Past studies addressing dynamics focused on the average of a  
46 group of individuals (i.e., population-level dynamics) having specific demographic characteristics  
47 such as age or sex (3-8) and thus have not led to personalized advice for individuals. Some  
48 studies included only health care workers and did not cover the whole spectrum of the general  
49 population, especially older adults and those with underlying medical conditions (4, 9-12). Most  
50 of the other studies targeted at the general population lumped antibody measurements together  
51 with different elapsed times since vaccination (12-17), making precise determination and  
52 comparison of individual dynamics difficult.

53           Here, we used a mathematical model (developed in (18)) to describe the process of  
54 differentiation from naïve B cells to plasma cells to accurately reconstruct individual vaccine-  
55 elicited antibody dynamics in the Fukushima vaccination cohort (a community-based cohort in  
56 Fukushima, Japan). The model parameters describe highly variable individual-level antibody  
57 responses, allowing us to partially predict variation in vaccine response on the basis of personal  
58 information including age, adverse reactions, comorbidities, and medication use. Furthermore,  
59 we devised a useful personalized antibody score that allows individuals to predict their antibody  
60 status from their personal information. The score can be used by medical practitioners to  
61 encourage individuals with low predicted antibody levels to get booster vaccinations.

## 62 Results

### 63 Deriving measures of peak, duration, and area under the curve of vaccine-elicited antibody 64 dynamics

65 We fully reconstructed the dynamics of IgG(S) titers after the first vaccination for 2,159  
66 individuals in the Fukushima vaccination cohort in **Supplementary Fig 1C** (see **Methods** in  
67 detail) and extracted the “features” described in **Fig 1A** for each individual: the peak, duration,  
68 and area under the curve (AUC) of the reconstructed antibody dynamics. To quantify these  
69 features, we here assumed  $A_{TH} = 100$  and determined  $t_s$  and  $t_e$  corresponding to the time for  
70 the antibody titer to be greater than and smaller than  $A_{TH}$ , respectively. Therefore, the duration  
71 and AUC of the antibody titer are formulated by  $t_e - t_s$  and  $\int_{t_s}^{t_e} A(s) ds$ , respectively. In addition,  
72 defining  $t_p$  to be the time for the antibody titer to reach its peak, the peak titer is  $A(t_p)$ . In **Fig**  
73 **1B**, we summarized distributions of the AUC, duration, and peak for 2,159 participants. We then  
74 compared these features among the participants. We used the logarithm ( $\log_{10}$ ) of the peak and  
75 of the AUC because these measures had a long-tailed distribution spanning at least two orders  
76 of magnitude (**Supplementary Fig 2A**). The Pearson correlation matrix (**Fig 1C**) showed that the  
77 AUC was highly correlated with the duration and the peak, meaning that the three features are  
78 similar. Note that a similar trend was obtained under a different  $A_{TH}$  (data not shown). These  
79 features allowed us to quantitatively compare vaccine-elicited antibody dynamics among the  
80 participants (see next section).

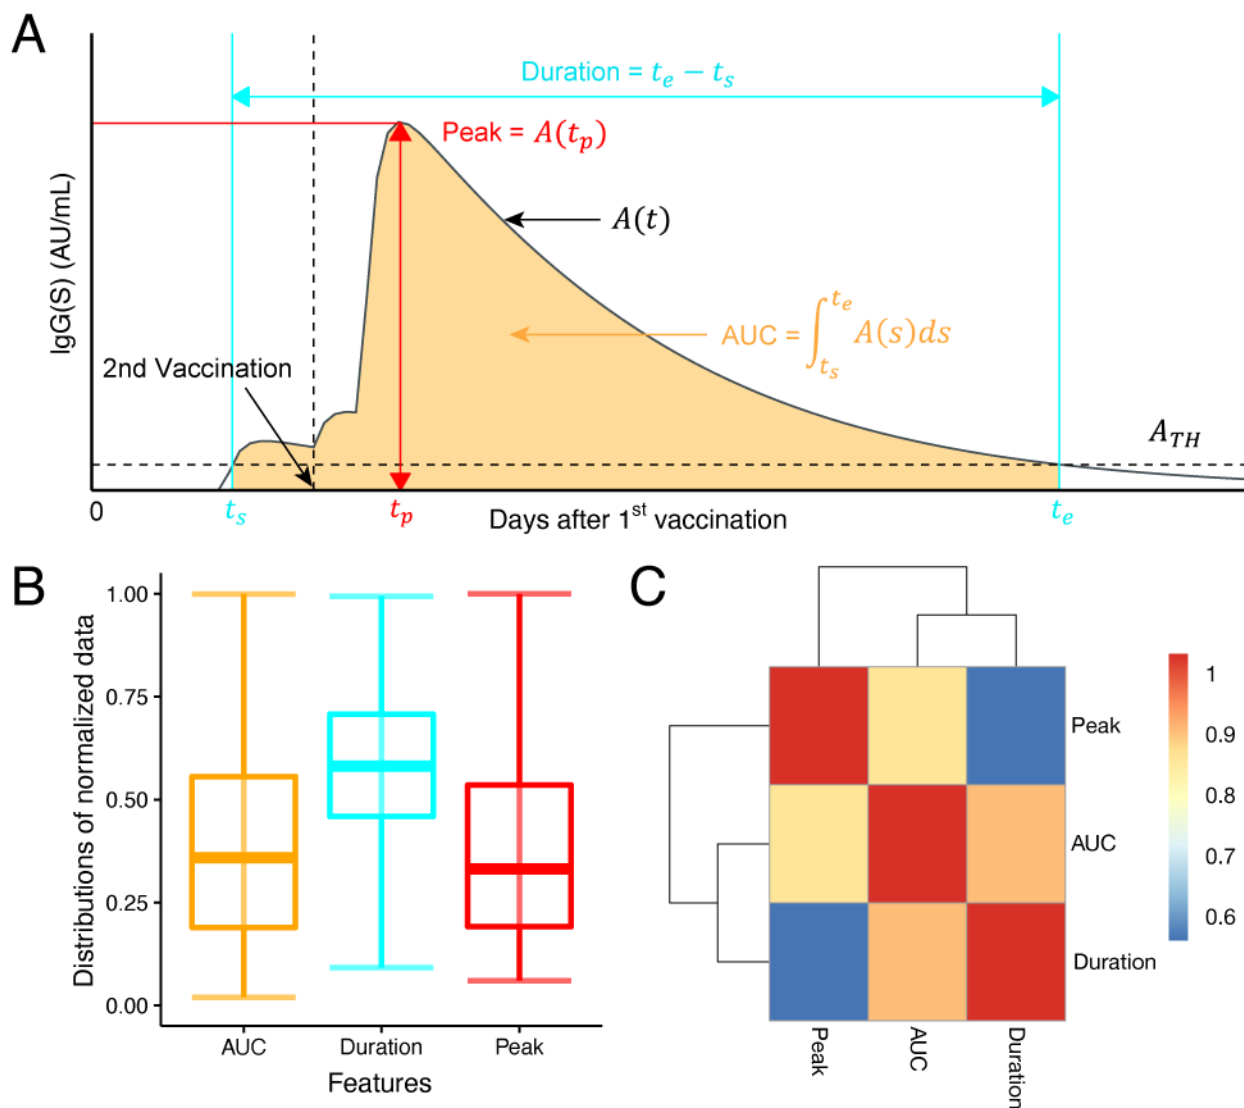

81  
82  
83  
84  
85  
86  
87  
88  
89  
90  
91  
92

**Figure 1 | Quantifying vaccine-elicited antibody dynamics:** **(A)** Vaccine-elicited antibody response after the first vaccination (i.e.,  $t = 0$ ) is described with the following “features”: the peak ( $A(t_p)$ ), duration ( $t_e - t_s$ ), and AUC ( $\int_{t_s}^{t_e} A(s) ds$ ) of the antibody titers. The vertical and horizontal dashed lines correspond to the date of the second vaccination and the arbitrary threshold ( $A_{TH}$ ) for calculating the duration and AUC, respectively. **(B)** Distributions of the extracted features from the reconstructed antibody dynamics (i.e., the peak, duration, and AUC) for 2,407 participants are plotted. The dataset for each distribution was normalized by the value corresponding to the 95th percentile of data values, and data whose values were larger than this value were removed to improve the visibility of the figure. **(C)** Heatmap plot showing Pearson correlation matrix describing three features ( $\log_{10}$  of peak,  $\log_{10}$  of AUC, duration) of antibody dynamics.

## 93 **Characterizing vaccine-elicited antibody dynamics**

94 To see how individual background factors contributed to the three features, we trained a  
95 random forest regressor to predict the features from basic demographic information for the  
96 participants, including underlying medical conditions, adverse reactions to vaccinations, and  
97 medications, as described in **Supplementary Table 1**. The out-of-bag (OOB) R squared values  
98 obtained were 15.9%, 27.9%, and 23.7% for the peak, AUC, and duration, respectively,  
99 suggesting that the features can be partially explained by the background information available.  
100 We visualized significant factors as a Chord diagram, in which the size of the arcs connecting  
101 individual factors to each of the three features indicates their importance in predicting the feature  
102 **(Fig 2A)**.

103 We used partial dependence plots to look into the dependence of these features on the  
104 continuous variables, i.e., age and the interval between the two doses **(Fig 2B)**. All the features  
105 decreased as age increased. Two features, the AUC and the peak, increased as the interval  
106 increased. By contrast, the duration was smallest at the interval of 21 days and increased as the  
107 interval became longer than that. However, we had only 13 participants with an interval of fewer  
108 than 20 days and the difference between their duration and the duration of others was not  
109 statistically significant ( $p = 0.61$ ). We next looked at the dependence of the features on categorical  
110 variables: we found that the presence of underlying diseases (collagen diseases and rheumatism)  
111 and medication use (antihistamines, immunosuppressants, and steroids) affected the features  
112 negatively, while the presence of adverse reactions affected the features positively. The result of  
113 a similar analysis on the model parameters  $H_2$  and  $m$  is shown in **Supplementary Fig 2B**.

114



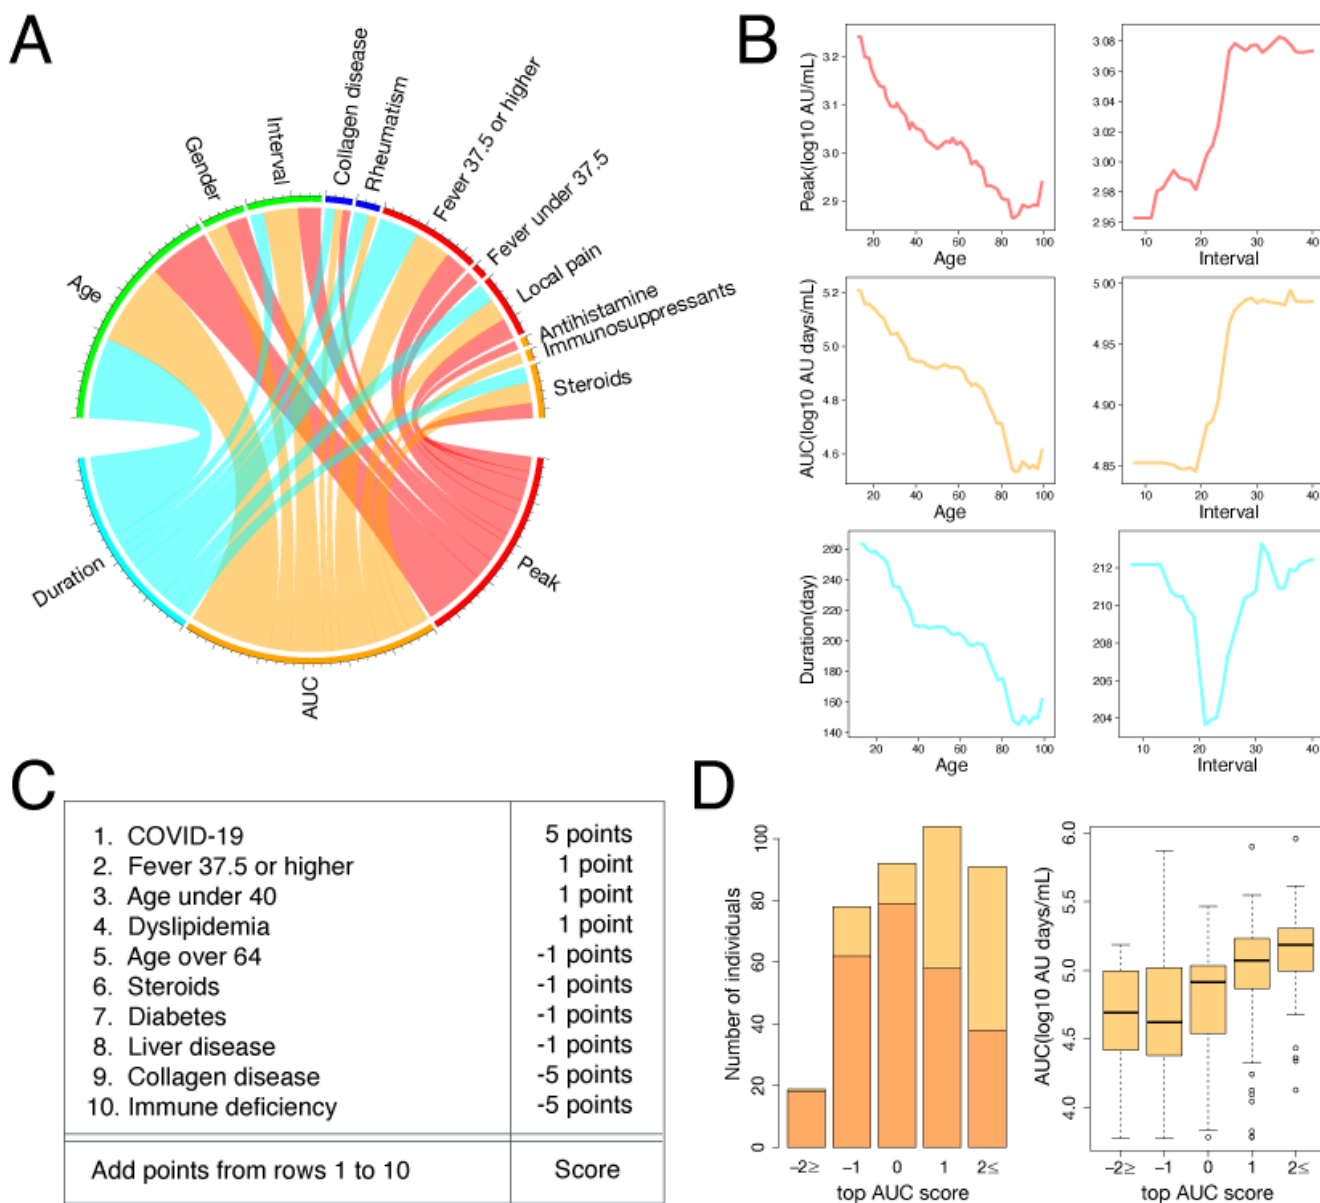

115

116 **Figure 2 | Characterizing and scoring vaccine-elicited antibody dynamics: (A)** Chord  
 117 diagram representing the most predictive factors of three “features” of antibody titers (i.e., peak,  
 118 duration, and AUC) is shown. The size of the arc from a group to a feature is proportional to its  
 119 importance as measured by Mean Decrease in Accuracy. Features with  $p < 0.05$  are displayed.  
 120 **(B)** Partial dependence plots showing the dependence of the three features on age or the interval  
 121 between two vaccinations are shown. **(C)** Metric for calculating the “top AUC score,” i.e., a score  
 122 to identify individuals with AUC in the top third of the population. **(D)** Left: Distribution of the top  
 123 AUC scores in the test dataset: 19, 78, 92, 104, and 91 individuals had scores of -2 or less, -1, 0,  
 124 1, or 2 or more, respectively. Those in the top third of the test dataset are shown in yellow, and  
 125 those not in the top third are shown in orange. The ratio of individuals with AUC in the top third of  
 126 the test dataset increased as the top AUC score increased. Right: the average AUC tended to  
 127 increase as the top AUC score increased.

## 128 Deriving a personalized antibody score

129 Combining the above demographic and health information, we devised a simple score  
130 that enables individuals to roughly estimate their antibody status. We chose the AUC of the  
131 antibody dynamics as a representative feature of individual antibody status, because the other  
132 features (the peak and the duration) are highly correlated with and similar to the AUC (**Fig 1C**).  
133 Recently, a systematic approach to fit optimized scores with mixed-integer nonlinear  
134 programming was proposed (19). We applied this method to construct two types of scores to  
135 cover the whole range of AUC: a score to predict whether an individual's AUC is in the top third  
136 of the population (i.e., top AUC score, **Fig 2C**) and a score to predict whether an individual's AUC  
137 is in the bottom third (i.e., bottom AUC score, **Supplementary Fig 2C**).

138 We first divided our dataset into training and test datasets. The training dataset consisted  
139 of participants in Minami Soma City and Hirata Village (1775 individuals), and the test dataset  
140 consisted of participants in Soma City (384 individuals). We used the training dataset for fitting  
141 the scores. The algorithm searches the space of linear combinations of features with integer  
142 coefficients from -5 to +5 to find the best combination to differentiate the population in the top third  
143 of the training dataset from the rest (or the bottom third from the rest) (**Fig 2C**). We then assessed  
144 the performance of these scores in the test dataset, that is, we tested whether the scores just  
145 created could differentiate the population in the top third of the test dataset from the rest (or the  
146 bottom third from the rest).

147 The top AUC scores in the test dataset were between -2 and 2, except for two individuals  
148 with scores of -5 and 4, respectively (**Fig 2D** left). The 91 individuals with scores of 2 or more  
149 (shown in yellow and orange) included 52 individuals (shown in yellow) whose AUC belonged to  
150 the top third of the test dataset population (57.1%). The 104 individuals with a score of 1 included  
151 46 individuals with AUC in the top third (44.2%). The 92 individuals with a score of 0 included 13  
152 individuals with AUC in the top third (14.1%). The 78 individuals with a score of -1 included 16  
153 individuals with AUC in the top third (20.5%). The 19 individuals with a score of -2 or less included  
154 only 1 individual with AUC in the top third (5.2%). Thus, the higher an individual's top AUC score,

155 the more likely they were to belong to the top third of the population and have a higher AUC as  
156 well (**Fig 2D** right). On the other hand, we calculated the bottom AUC scores in the test dataset,  
157 which were between -4 and 2, except for one individual with a score of 3 (**Supplementary Fig**  
158 **2D** left). We confirmed similar trends. For example, the 65 individuals with a score of 1 included  
159 34 individuals with AUC in the bottom third (52.3%). Thus, the higher an individual's bottom AUC  
160 score, the more likely they were to belong to the bottom third of the population and have a lower  
161 AUC as well (**Supplementary Fig 2D** right). These results suggest that the personalized AUC  
162 score can estimate individual antibody status with reasonable accuracy, helping individuals make  
163 informed decisions about their disease prevention.

## 164 Discussion

165 In this study, we created a personalized antibody score that evaluates the antibody status  
166 of individuals. To make an optimal score, we used a mathematical model of antibody production  
167 in response to two-dose mRNA vaccinations, as developed in our previous paper (18), and  
168 reconstructed the vaccine-elicited antibody dynamics of 2,159 participants from the Fukushima  
169 vaccination cohort. Our mechanism-based mathematical modeling, in contrast to the statistical  
170 modeling used in recent reports (3, 20), enabled biologically accurate description and precise  
171 comparison of antibody dynamics. The parameters of the estimated dynamics showed a large  
172 variation spanning two orders of magnitude. This variation was partially explained by individual  
173 characteristics like age, sex, the interval between the two vaccine doses, adverse reactions,  
174 comorbidities, and medications taken. This result is consistent with previous studies reporting age,  
175 sex, vaccine interval, and comorbidities as factors affecting antibody titers (21, 22). Quantifying  
176 the variability in antibody dynamics can be a basis for policy decisions regarding the distribution  
177 of booster vaccines to strengthen immunity (23) or the use of oral antiviral drugs for the treatment  
178 of breakthrough infections (24).

179 Our antibody scores can be easily calculated from individual demographic and health  
180 information, yet have the ability to identify participants with high and low antibody titers (AUC of  
181 the IgG(S) titers). Given the pleiotropic aspect of humoral immunity, it is surprising that a score  
182 consisting of only 10 questionnaire items can give reasonable predictions. The score showed that  
183 COVID-19 infection history and adverse reactions positively affect the AUC, whereas age,  
184 diabetes, and collagen diseases negatively affect the AUC. These positive and negative factors  
185 are consistent with previous studies (22, 25-28). In addition, diabetes and autoimmune diseases  
186 have been reported to be risk factors for breakthrough infections (29, 30). Considering that  
187 individual antibody titers are partially predictive of the likelihood of breakthrough infections (31,  
188 32), this suggests that our antibody score could also be used as a risk score for breakthrough  
189 infections. On the other hand, the antibody score also has some similarities with COVID-19  
190 severity scores (33-37). In fact, both include age as a factor likely to lead to low antibody titers

191 and critical illness, both of which may be related to a defective immune system, as observable in  
192 cytokine signatures (38, 39) or immunoglobulin responses (40, 41). However, whereas COVID-  
193 19 severity scores use the results of laboratory tests and clinical symptoms to assess the patient's  
194 condition in the hospital, our antibody score can be calculated on the basis of questionnaire  
195 responses provided by individual (i.e., not limited to patients) themselves.

196         There are limitations to this study. The model fitting was based on limited antibody  
197 measurements (two or three times for most participants) and the antibody score was solely based  
198 on information available from the questionnaire. Further refinement of the score using additional  
199 information will be a worthwhile task. It is worth mentioning that the immune system is affected  
200 by multiple factors, including genetics, the environment (such as cohabitation), and markers of  
201 metabolic health (42-45), all of which likely influence individual antibody status but were not  
202 considered here. The biological determinants of antibody variation will be further revealed in future  
203 studies addressing not only B cell subsets but the whole immune system encompassing adaptive  
204 as well as innate immunity. At this stage, our score would best be used by medical practitioners  
205 as a tool to advise individuals on getting booster vaccinations or taking additional precautions  
206 against infection.

## 207 **Methods**

### 208 **Study data**

209 This study was conducted from April 2021 to December 2021 in Fukushima, Japan (called  
210 the Fukushima vaccination cohort). A total of 2,526 participants who had been vaccinated with  
211 Pfizer BNT162b2 or Moderna mRNA-1273 were recruited, and 2,159 participants were included  
212 in the final data analysis. The participants included health care workers, frontline workers,  
213 administrative officers, general residents, and residents of long-term care facilities. We here  
214 investigated antibody titers of individuals sampled longitudinally (serum was collected at 2 or 3  
215 different timepoints) for around 4 to 9 months after the second primary dose of mRNA vaccine.  
216 Information on sex, age, daily medication, medical history, date of vaccination, adverse reactions  
217 after vaccination, type of vaccination, blood type, Bacillus Calmette–Guérin (BCG) vaccine history,  
218 smoking habits, and drinking habits were retrieved from the paper-based questionnaire  
219 (summarized in **Supplementary Table 1**). In addition to the participants in the cohort, we included  
220 12 health care workers whose serum had been sequentially sampled for 40 days (on average 25  
221 samples per individual) in our analysis for the validation and parameterization of a mathematical  
222 model for vaccine-elicited antibody dynamics. All serological assays were conducted at The  
223 University of Tokyo. (S)-specific IgG (i.e., IgG(S)) and neutralizing activity were measured as the  
224 humoral immune status after the COVID-19 vaccination. (N)-specific IgG antibody titers (IgG(N))  
225 were used to determine past COVID-19 infection status (46). The study was approved by the  
226 ethics committees of Hirata Central Hospital (number 2021-0611-1) and Fukushima Medical  
227 University School of Medicine (number 2021-116). Written informed consent was obtained from  
228 all participants individually before the survey. A portion of this cohort was described previously for  
229 the period extending to 6 months after the first dose of mRNA vaccine (46, 47).

### 231 **Modeling vaccine-elicited antibody dynamics**

232 We recently developed a mathematical model describing COVID-19 vaccine-elicited  
233 antibody dynamics to evaluate the impact of primary two-dose COVID-19 vaccination on rapid

234 immunity at the individual level and reconstructed the best-fit antibody titer curves of 2,407  
235 participants in the Fukushima cohort (18). Here we explain the derivation and formulation of the  
236 mathematical model in detail.

237

### 238 (i) Vaccination-elicited antibody dynamics after the first dose

239 After the first vaccination, naïve B cells encounter the antigens and differentiate into short-  
240 lived antibody-secreting cells (ASCs), plasmablasts, germinal center (GC) B cells, or GC-  
241 independent memory B cells depending on BCR affinity for their cognate antigen (48). Then, the  
242 GC B cells undergo rapid proliferation with somatic immunoglobulin hypermutation and  
243 subsequently differentiate into GC-dependent memory B cells or long-lived antibody-secreting  
244 cells, which are plasma cells with immunoglobulin class switching. To describe this antigen-  
245 specific B cell expansion and the induction of antibody-secreting cells and memory B cells after  
246 the first vaccination (**Supplementary Fig 3A**), we developed a simple but quantitative  
247 mathematical model as follows:

$$248 \quad \frac{dM_1(t)}{dt} = \begin{cases} 0 & (t < \tau_1) \\ -dM_1(t) & (t \geq \tau_1) \end{cases} \quad (1)$$

$$249 \quad \frac{dB(t)}{dt} = P_1(t) \frac{M_1(t)^m}{K^m + M_1(t)^m} - \mu B(t), \quad (2)$$

$$250 \quad \frac{dA(t)}{dt} = pB(t) - cA(t), \quad (3)$$

251 where the variables  $M_1(t)$ ,  $B(t)$ , and  $A(t)$  are the amount of mRNA inoculated by the  
252 vaccination, the number of antibody-secreting cells, and the antibody titers at time  $t$ , respectively.  
253 The parameters  $\tau_1$  and  $d$  represent the timing of the vaccination and the decay rate of mRNA.  
254 We here considered  $D_1$  to be the inoculated dose of mRNA by the vaccination, that is,  $M_1(\tau_1) =$   
255  $D_1$ .

256 Because the data we used here were limited (i.e., only time-course vaccine-elicited  
257 IgG(S) titers), one compartment of B cells including heterogeneous cell populations that produce  
258 antibodies (i.e., short-lived and long-lived antibody-secreting cells) was assumed. Therefore, we



259 modelled the average B cell population dynamics in Eq.(2), where the product of  $P_1(t)$  and  
 260  $M_1(t)^m/(M_1(t)^m + K^m)$  represents the average *de novo* induction of the antibody-secreting cells.  
 261  $P_1(t)$  is a step function defined as  $P_1(t) = P_1$  for  $\tau_1 + \eta_1 \leq t$ , where  $\eta_1$  is the delay of induction  
 262 of antibody-secreting cells after vaccination: otherwise  $P_1(t) = 0$ . The parameters  $m$ ,  $K$ , and  $\mu$   
 263 correspond to the steepness at which the induction increases with increasing amount of mRNA  
 264 (i.e., the Hill coefficient), the amount of mRNA satisfying  $P_1/2$ , and the average decay rate of the  
 265 antibody-secreting cell compartment, respectively. The other parameters,  $p$  and  $c$ , represent the  
 266 antibody production rate and the clearance rate of antibodies, respectively.

267

## 268 (ii) Vaccination-elicited antibody dynamics after the second dose

269 After the second vaccination, the memory B cells are reactivated by re-exposure to the  
 270 antigen. Some differentiate into short-lived antibody-secreting cells (plasmablasts) or memory B  
 271 cells outside the GC. Others enter the GC to become secondary GC B cells. Subsequently, these  
 272 secondary GC B cells differentiate into GC-dependent memory B cells or long-lived antibody-  
 273 secreting cells (plasma cells). To describe these recall B cell responses and their secretion of  
 274 antibody after the second vaccination (**Supplementary Fig 3B**), we modified the above  
 275 mathematical model, Eqs.(1-3), as follows:

$$276 \quad \frac{dM_2(t)}{dt} = \begin{cases} 0 & (t < \tau_2) \\ -dM_2(t) & (t \geq \tau_2) \end{cases} \quad (4)$$

$$277 \quad \frac{dB(t)}{dt} = P_2(t) \frac{(M_1(t) + M_2(t))^m}{K^m + (M_1(t) + M_2(t))^m} - \mu B(t), \quad (5)$$

$$278 \quad \frac{dA(t)}{dt} = pB(t) - cA(t), \quad (6)$$

279 where  $M_2(t)$  is the amount of mRNA by the vaccination inoculated at  $\tau_2$  satisfying  $M_2(\tau_2) = D_2$ .  
 280 In addition,  $P_2(t) = P_1$  for  $\tau_2 \leq t < \tau_2 + \eta_2$ ,  $P_2(t) = P_2$  for  $\tau_2 + \eta_2 \leq t$ , where  $\eta_2$  is the delay of  
 281 induction of antibody-secreting cells after vaccination; otherwise  $P_2(t) = 0$ . It should be noted  
 282 that, prior to this main recall immunity, some rapid but small reactivation is observed, probably  
 283 due to GC-independent memory B cells induced by the first vaccination (see participants S2, S7,



284 and S8 in **Supplementary Fig 1A**). This small reactivation is described by  $P_1(M_1(t) + M_2(t))^m /$   
285  $((M_1(t) + M_2(t))^m + K^m)$  for  $\tau_2 \leq t < \tau_2 + \eta_2$ . In general, once reactivated, memory B cells can  
286 reenter the GC more rapidly than naïve B cells, and therefore the secondary antibody responses  
287 are much faster and larger (i.e.,  $\eta_1 > \eta_2$  and  $P_1 < P_2$ , respectively). In the main recall immunity,  
288 the quantity and quality of memory B cells established by the first vaccination is included in  $P_2$ .

### 290 (iii) Mathematical model for data fitting

291 Since the clearance rate of antibody is much larger than the decay of antibody-secreting  
292 cells (i.e.,  $c \gg \mu$ ), we made a quasi-steady state assumption,  $dA(t)/dt = 0$ , and replaced  
293 Eqs.(3) and (6) with  $A(t) = pB(t)/c$ . Moreover, since Eqs.(1) and (4) are the linear differential  
294 equations,  $M_1(t) = D_1 e^{-dt}$  for  $t \geq \tau_1$  and  $M_2(t) = D_2 e^{-dt}$  for  $t \geq \tau_2$ : otherwise  $M_1(t) =$   
295  $M_2(t) = 0$ , respectively. Thus, the above Eqs.(1-6) are further simplified assuming  $\tau_1 = 0$  and  
296  $D_1 > 0$ , and we obtained the following single ordinary differential equation, which we used to  
297 analyze the antibody responses (i.e., IgG(S) titers (AU/mL)) in this study:

$$298 \quad \frac{dA(t)}{dt} = H(t) \frac{(D_1 e^{-dt} + D_2 e^{-d(t-\tau_2)})^m}{K^m + (D_1 e^{-dt} + D_2 e^{-d(t-\tau_2)})^m} - \mu A(t), \quad (7)$$

299 where  $H(t) = H_i = pP_i/c$  for  $\tau_i + \eta_i \leq t < \tau_{i+1} + \eta_{i+1}$  ( $i = 1$  or  $2$ ) and  $D_2 > 0$  for  $\tau_2 < t$ :  
300 otherwise  $D_2 = 0$ . This simple model can quantify the vaccine-elicited time-course antibody  
301 dynamics as described in **Fig 1A** under an arbitrary threshold of antibody titers  $A_{TH}$  (see below).

### 302 303 Parameter estimations

304 To evaluate the primary two-dose COVID-19 vaccination leading to the antibody titers  
305 (i.e., IgG(S) titers), we used a nonlinear mixed effects model to fit the antibody dynamics model,  
306 given by Eq.(7), to the longitudinal antibody titers of IgG(S) obtained from the 12 health care  
307 workers. Briefly, the parameters for individual  $k$ ,  $\theta_k (= \theta \times e^{\pi_k})$ , are represented as a product of  
308  $\theta$  (a fixed effect) and  $e^{\pi_k}$  (a random effect).  $\pi_k$  follows a normal distribution with mean 0 and  
309 standard deviation  $\Omega$ . We here assumed that the parameters  $H_1, H_2, \eta_1, \eta_2$ , and  $m$  vary across

310 individuals, although we do not consider the inter-individual variability in other parameters to  
311 ensure parameter identifiability. Note that the half-life of mRNA (i.e.,  $\log 2 / d$ ) and dose of mRNA  
312 (i.e.,  $D_i$ ) are assumed to be 1 day (49) and 100 ( $\mu\text{g}/0.5\text{mL}$ ) (50), respectively. We estimated  
313 fixed effects and random effects using the stochastic approximation expectation-approximation  
314 algorithm and empirical Bayes' method, respectively. Fitting was performed using MONOLIX  
315 2019R2 ([www.lixoft.com](http://www.lixoft.com)) (51). The estimated (fixed and individual) parameters are listed in  
316 **Supplementary Table 2**.

317 With the estimated parameters for each individual, the dynamics of IgG(S) titers,  $A(t)$ ,  
318 and the average *de novo* antibody response elicited by the first and second vaccinations,  
319  $H(t)(D_1e^{-dt} + D_2e^{-d(t-\tau_2)})^m / (K^m + (D_1e^{-dt} + D_2e^{-d(t-\tau_2)})^m)$ , were calculated in  
320 **Supplementary Fig 1A** and **1B**, respectively. Interestingly, we observed that the variations  
321 induced by the second vaccination were much larger than those induced by the first vaccination  
322 (**Supplementary Fig 1B**). Although we found that most of the best-fitted estimated parameters  
323 in the mathematical model (i.e.,  $\mu$ ,  $K$ ,  $\eta_1$ ,  $\eta_2$ ,  $H_1$ ) were the same or similar across the 12  
324 individuals, the parameters  $m$  and  $H_2$ , which contribute mainly to the vaccine-elicited antibody  
325 dynamics after the second vaccination, showed wide variation of estimated values (see  
326 **Supplementary Table 2**). Therefore, fixing these estimated population parameters except for  $m$   
327 and  $H_2$ , we applied a nonlinear least squares method to reconstruct the large variations of the  
328 antibody dynamics after the second dose for 2,159 participants. The best-fit antibody titer curves  
329 are plotted along with the observed data for visualization in **Supplementary Fig 1C**, and the  
330 distribution of parameter values  $m$  and  $H_2$  are summarized in **Supplementary Fig 1D**.

331

### 332 **Random forest regressors for characterizing vaccine-elicited antibody dynamics**

333 Random forest regressors were trained to predict any of the three features of antibody  
334 dynamics (log of peak, log of AUC, duration) on the basis of the participants' demographic and  
335 health information as obtained by questionnaire (see Statistical analysis). randomForest and

336 rfPermute packages in R were used. The R squared values for each regressor were calculated  
337 from OOB samples. Feature importance, which shows to what extent each factor was predictive  
338 of the antibody dynamics features, was based on percentage increase in mean squared errors  
339 and is shown as Chord diagrams (circlize package in R), in which arrows are drawn from each  
340 feature to its predictive factors in a circular layout. Only the factors with  $p < 0.05$  (obtained with  
341 1,000 permutations) were selected and shown.

342

### 343 **Building optimized antibody scores**

344 A Python implementation of Ustun et al.'s (19) algorithm (risk-slim,  
345 <https://github.com/ustunb/risk-slim>) was used to build optimized AUC scores. Briefly, the  
346 algorithm searches for the best linear combination of features with integer coefficients that  
347 minimizes the sum of the logistic loss and the  $l_0$ -norm of the coefficients. The range of coefficients  
348 was set to -5 to +5; the  $l_0$ -penalty parameter  $C_0$  was set to  $5 \times 10^{-4}$ .

349

### 350 **Statistical analysis**

351 Answers to the paper-based questionnaire collected from 2,159 participants were  
352 converted into a set of categorical and numerical variables. Numerical variables included age and  
353 the interval between the two doses. These variables were then used as input to predict the three  
354 antibody dynamics features. Missing values of categorical variables were treated as a separate  
355 category and were included in the analyses. The variables used here belonged to any of the five  
356 categories: (i) basic demographic information and lifestyle habits, (ii) information on vaccinations,  
357 (iii) underlying medical conditions, (iv) adverse reactions, and (v) medications being taken. When  
358 necessary, the same variables were compared among different generations or different groups  
359 using Pearson's chi-square test (for categorical variables), analysis of variance (ANOVA, for more  
360 than two numerical variables), or Welch T-test (for two numerical variables). Pearson correlation  
361 coefficient was calculated to evaluate the association between a pair of continuous variables. All  
362 statistical analyses were performed using R (version 4.1.2).

363 **List of supplementary materials**

364 **Supplementary Figure 1** | Calibrating vaccine-elicited antibody dynamics

365 **Supplementary Figure 2** | Analyzing antibody titers

366 **Supplementary Figure 3** | Modeling vaccine-elicited B cell dynamics

367 **Supplementary Table 1** | Basic demographics

368 **Supplementary Table 2** | Estimated fixed and individual parameters

369

## 370 References

- 371 1. B. A. Dickerman *et al.*, Comparative Effectiveness of BNT162b2 and mRNA-1273 Vaccines in  
372 U.S. Veterans. *N Engl J Med* **386**, 105-115 (2022).
- 373 2. J. Hippisley-Cox *et al.*, Risk prediction of covid-19 related death and hospital admission in adults  
374 after covid-19 vaccination: national prospective cohort study. *BMJ* **374**, n2244 (2021).
- 375 3. J. Wei *et al.*, Antibody responses and correlates of protection in the general population after two  
376 doses of the ChAdOx1 or BNT162b2 vaccines. *Nat Med* **28**, 1072-1082 (2022).
- 377 4. E. G. Levin *et al.*, Waning Immune Humoral Response to BNT162b2 Covid-19 Vaccine over 6  
378 Months. *N Engl J Med* **385**, e84 (2021).
- 379 5. C. Anastassopoulou *et al.*, Age and sex associations of SARS-CoV-2 antibody responses post  
380 BNT162b2 vaccination in healthcare workers: A mixed effects model across two vaccination  
381 periods. *PLoS One* **17**, e0266958 (2022).
- 382 6. J. Wei *et al.*, Antibody responses to SARS-CoV-2 vaccines in 45,965 adults from the general  
383 population of the United Kingdom. *Nat Microbiol* **6**, 1140-1149 (2021).
- 384 7. D. R. Feikin *et al.*, Duration of effectiveness of vaccines against SARS-CoV-2 infection and  
385 COVID-19 disease: results of a systematic review and meta-regression. *Lancet* **399**, 924-944  
386 (2022).
- 387 8. N. Doria-Rose *et al.*, Antibody Persistence through 6 Months after the Second Dose of mRNA-  
388 1273 Vaccine for Covid-19. *N Engl J Med* **384**, 2259-2261 (2021).
- 389 9. J. Favresse *et al.*, Antibody titres decline 3-month post-vaccination with BNT162b2. *Emerg*  
390 *Microbes Infect* **10**, 1495-1498 (2021).
- 391 10. M. Tre-Hardy, R. Cupaiolo, A. Wilmet, I. Beukinga, L. Blairon, Waning antibodies in SARS-  
392 CoV-2 naive vaccinees: Results of a three-month interim analysis of ongoing immunogenicity and  
393 efficacy surveillance of the mRNA-1273 vaccine in healthcare workers. *J Infect* **83**, 381-412  
394 (2021).
- 395 11. A. V. Wisniewski, J. Campillo Luna, C. A. Redlich, Human IgG and IgA responses to COVID-19  
396 mRNA vaccines. *PLoS One* **16**, e0249499 (2021).
- 397 12. A. Padoan *et al.*, Neutralizing antibody titers six months after Comirnaty vaccination: kinetics and  
398 comparison with SARS-CoV-2 immunoassays. *Clin Chem Lab Med* **60**, 456-463 (2022).
- 399 13. J. Van Praet *et al.*, Predictors and Dynamics of the Humoral and Cellular Immune Response to  
400 SARS-CoV-2 mRNA Vaccines in Hemodialysis Patients: A Multicenter Observational Study. *J*  
401 *Am Soc Nephrol* 10.1681/ASN.2021070908 (2021).
- 402 14. E. Terpos *et al.*, Sustained but Declining Humoral Immunity Against SARS-CoV-2 at 9 Months  
403 Postvaccination With BNT162b2: A Prospective Evaluation in 309 Healthy Individuals.  
404 *Hemasphere* **6**, e677 (2022).
- 405 15. D. Urlaub *et al.*, Neutralizing antibody responses 300 days after SARS-CoV-2 infection and  
406 induction of high antibody titers after vaccination. *Eur J Immunol* **52**, 810-815 (2022).
- 407 16. F. J. Ibarondo *et al.*, Primary, Recall, and Decay Kinetics of SARS-CoV-2 Vaccine Antibody  
408 Responses. *ACS Nano* 10.1021/acsnano.1c03972 (2021).
- 409 17. M. Meyer *et al.*, Humoral immune response after COVID-19 infection or BNT162b2 vaccine  
410 among older adults: evolution over time and protective thresholds. *Geroscience* 10.1007/s11357-  
411 022-00546-y (2022).
- 412 18. N. Nakamura *et al.*, Stratifying elicited antibody dynamics after two doses of SARS-CoV-2  
413 vaccine in a community-based cohort in Fukushima, Japan. *medRxiv*  
414 10.1101/2022.06.11.22276266, 2022.2006.2011.22276266 (2022).
- 415 19. B. Ustun, C. Rudin, Learning Optimized Risk Scores. *J Mach Learn Res* **20** (2019).
- 416 20. L. Perez-Alos *et al.*, Modeling of waning immunity after SARS-CoV-2 vaccination and  
417 influencing factors. *Nat Commun* **13**, 1614 (2022).
- 418 21. H. Parry *et al.*, Extended interval BNT162b2 vaccination enhances peak antibody generation. *NPJ*  
419 *Vaccines* **7**, 14 (2022).
- 420 22. H. Ward *et al.*, Population antibody responses following COVID-19 vaccination in 212,102  
421 individuals. *Nat Commun* **13**, 907 (2022).

- 422 23. M. K. Patel, Booster Doses and Prioritizing Lives Saved. *N Engl J Med* **385**, 2476-2477 (2021).  
423 24. R. Dal-Re, S. L. Becker, E. Bottieau, S. Holm, Availability of oral antivirals against SARS-CoV-2  
424 infection and the requirement for an ethical prescribing approach. *Lancet Infect Dis*  
425 10.1016/S1473-3099(22)00119-0 (2022).  
426 25. N. N. M. Soetedjo, M. R. Iryaningrum, S. Lawrensia, H. Permana, Antibody response following  
427 SARS-CoV-2 vaccination among patients with type 2 diabetes mellitus: A systematic review.  
428 *Diabetes Metab Syndr* **16**, 102406 (2022).  
429 26. R. Grainger, A. H. J. Kim, R. Conway, J. Yazdany, P. C. Robinson, COVID-19 in people with  
430 rheumatic diseases: risks, outcomes, treatment considerations. *Nat Rev Rheumatol* **18**, 191-204  
431 (2022).  
432 27. N. Tani *et al.*, Relation of fever intensity and antipyretic use with specific antibody response after  
433 two doses of the BNT162b2 mRNA vaccine. *Vaccine* **40**, 2062-2067 (2022).  
434 28. A. Kanizsai *et al.*, Fever after Vaccination against SARS-CoV-2 with mRNA-Based Vaccine  
435 Associated with Higher Antibody Levels during 6 Months Follow-Up. *Vaccines (Basel)* **10**  
436 (2022).  
437 29. S. Ahmed *et al.*, Postvaccination antibody titres predict protection against COVID-19 in patients  
438 with autoimmune diseases: survival analysis in a prospective cohort. *Ann Rheum Dis* **81**, 868-874  
439 (2022).  
440 30. R. Marfella *et al.*, Glycaemic control is associated with SARS-CoV-2 breakthrough infections in  
441 vaccinated patients with type 2 diabetes. *Nat Commun* **13**, 2318 (2022).  
442 31. M. Z. Tay *et al.*, Decreased memory B cell frequencies in COVID-19 delta variant vaccine  
443 breakthrough infection. *EMBO Mol Med* **14**, e15227 (2022).  
444 32. M. Lipsitch, F. Krammer, G. Regev-Yochay, Y. Lustig, R. D. Balicer, SARS-CoV-2 breakthrough  
445 infections in vaccinated individuals: measurement, causes and impact. *Nat Rev Immunol* **22**, 57-65  
446 (2022).  
447 33. S. Goodacre *et al.*, Derivation and validation of a clinical severity score for acutely ill adults with  
448 suspected COVID-19: The PRIEST observational cohort study. *PLoS One* **16**, e0245840 (2021).  
449 34. W. Liang *et al.*, Development and Validation of a Clinical Risk Score to Predict the Occurrence of  
450 Critical Illness in Hospitalized Patients With COVID-19. *JAMA Intern Med* **180**, 1081-1089  
451 (2020).  
452 35. F. Gude *et al.*, Development and validation of a clinical score to estimate progression to severe or  
453 critical state in COVID-19 pneumonia hospitalized patients. *Sci Rep* **10**, 19794 (2020).  
454 36. C. Fumagalli *et al.*, Clinical risk score to predict in-hospital mortality in COVID-19 patients: a  
455 retrospective cohort study. *BMJ Open* **10**, e040729 (2020).  
456 37. I. Huespe *et al.*, COVID-19 Severity Index: A predictive score for hospitalized patients. *Med*  
457 *Intensiva (Engl Ed)* 10.1016/j.medin.2020.12.001 (2020).  
458 38. D. M. Del Valle *et al.*, An inflammatory cytokine signature predicts COVID-19 severity and  
459 survival. *Nat Med* **26**, 1636-1643 (2020).  
460 39. C. Lucas *et al.*, Longitudinal analyses reveal immunological misfiring in severe COVID-19.  
461 *Nature* **584**, 463-469 (2020).  
462 40. T. Zohar *et al.*, Compromised Humoral Functional Evolution Tracks with SARS-CoV-2  
463 Mortality. *Cell* **183**, 1508-1519 e1512 (2020).  
464 41. C. Lucas *et al.*, Delayed production of neutralizing antibodies correlates with fatal COVID-19.  
465 *Nat Med* **27**, 1178-1186 (2021).  
466 42. A. Liston, E. J. Carr, M. A. Linterman, Shaping Variation in the Human Immune System. *Trends*  
467 *Immunol* **37**, 637-646 (2016).  
468 43. T. Lakshminanth *et al.*, Human Immune System Variation during 1 Year. *Cell Rep* **32**, 107923  
469 (2020).  
470 44. P. Brodin *et al.*, Variation in the human immune system is largely driven by non-heritable  
471 influences. *Cell* **160**, 37-47 (2015).  
472 45. A. Liston, S. Humblet-Baron, D. Duffy, A. Goris, Human immune diversity: from evolution to  
473 modernity. *Nat Immunol* **22**, 1479-1489 (2021).



- 474 46. Y. Kobashi *et al.*, The difference between IgM and IgG antibody prevalence in different  
475 serological assays for COVID-19; lessons from the examination of healthcare workers. *Int*  
476 *Immunopharmacol* **92**, 107360 (2021).
- 477 47. Y. Kobashi *et al.*, Seroprevalence of SARS-CoV-2 antibodies among hospital staff in rural Central  
478 Fukushima, Japan: A historical cohort study. *Int Immunopharmacol* **98**, 107884 (2021).
- 479 48. B. J. Laidlaw, A. H. Ellebedy, The germinal centre B cell response to SARS-CoV-2. *Nat Rev*  
480 *Immunol* **22**, 7-18 (2022).
- 481 49. P. Anand, V. P. Stahel, Correction to: The safety of Covid-19 mRNA vaccines: a review. *Patient*  
482 *Saf Surg* **15**, 22 (2021).
- 483 50. D. Y. Lin *et al.*, Effectiveness of Covid-19 Vaccines over a 9-Month Period in North Carolina. *N*  
484 *Engl J Med* **386**, 933-941 (2022).
- 485 51. P. Traynard, G. Ayral, M. Twarogowska, J. Chauvin, Efficient Pharmacokinetic Modeling  
486 Workflow With the MonolixSuite: A Case Study of Remifentanyl. *CPT Pharmacometrics Syst*  
487 *Pharmacol* **9**, 198-210 (2020).
- 488  
489

## 490 Acknowledgments

491 We would like to thank all the staff from Fukushima Medical University, Seireikai health  
492 care group, Hirata Village office, Soma City office, Soma Central Hospital, Soma General Hospital,  
493 Minamisoma City office, Minamisoma City Medical Association, Minamisoma Municipal General  
494 Hospital, Shindo Clinic and Medical Governance Institute, who contributed significantly to the  
495 accomplishment of this research, especially, Ms. Yuka Harada, Ms. Serina Noji, Ms. Naomi Ito,  
496 Dr. Makoto Kosaka, Mr. Anju Murayama, Mr. Sota Sugiura, Mr. Manato Tanaka, Ms. Yuna Uchi,  
497 Mr. Yudai Kaneda, Mr. Masahiko Nihei, Mr. Hideo Sato, Ms. Rie Yanai, Ms. Yasuko Suzuki, Ms.  
498 Keiko Abe, Dr. Hidekiyo Tachiya, Mr. Kouki Nakatsuka, Dr. Ryuzaburo Shineha, Ms. Miki Sato,  
499 Dr. Masahiko Sato, Mr. Naoharu Tadano, Mr. Kazuo Momma, Mr. Shu-ichi Mori, Ms. Saori  
500 Yoshisato, Ms. Katsuko Onoda, Mr. Satoshi Kowata, Mr. Masatsugu Tanaki, Dr. Tomoyoshi  
501 Oikawa, Dr. Joji Shindo, Ms. Xujin Zhu, Ms. Asaka Saito, Ms. Yuumi Kondo, and Ms. Tomoyo  
502 Nishimura. This study was supported by Medical & Biological Laboratories Co., Ltd., Shenzhen  
503 YHLO Biotech Co., Ltd., the distributor and manufacturer of the antibody measurement system  
504 (iFlash 3000), Research Center for Advanced Science and Technology in the University of Tokyo,  
505 and in part by Scientific Research (KAKENHI) B 18H01139 (to S.I.), 16H04845 (to S.I.); Scientific  
506 Research in Innovative Areas 20H05042 (to S.I.); AMED Strategic International Brain Science  
507 Research Promotion Program 22wm0425011s0302 (to K.A.); AMED JP22dm0307009 (to K.A.);  
508 AMED CREST 19gm1310002 (to S.I.); AMED Development of Vaccines for the Novel  
509 Coronavirus Disease, 21nf0101638h0001 (to M.T.), 21nf0101638s0201 (to S.I.); AMED Japan  
510 Program for Infectious Diseases Research and Infrastructure, 22wm0325007h0001 (to S.I.),  
511 22wm0325004s0201 (to S.I.), 22wm0325012s0301 (to S.I.), 22wm0325015s0301 (to S.I.); AMED  
512 Research Program on Emerging and Re-emerging Infectious Diseases 22fk0108140s0802 (to  
513 S.I.); AMED Research Program on HIV/AIDS 22fk0410052s0401 (to S.I.); AMED Program for  
514 Basic and Clinical Research on Hepatitis 22fk0210094 (to S.I.); AMED Program on the Innovative  
515 Development and the Application of New Drugs for Hepatitis B 22fk0310504h0501 (to S.I.); AMED  
516 Research Program on Hepatitis 19fk0210036h0502 (to S.I.), 19fk0310114h0103 (to S.I.); JST



517 MIRAI JPMJMI22G1 (to S.I.); Moonshot R&D JPMJMS2021 (to K.A. and S.I.) and JPMJMS2025  
518 (to S.I.); The National Research Foundation of Korea (NRF) grant funded by the Korea  
519 government (MSIT) (2022R1C1C2003637) (to K.S.K.); Shin-Nihon of Advanced Medical  
520 Research (to S.I.); SECOM Science and Technology Foundation (to S.I.); The Japan Prize  
521 Foundation (to S.I.); and Kowa Co (to M.T.).

522

## 523 **Author contributions**

524 SI designed the research. MT conducted the data collection. NN, HP, KSK, SIwanami,  
525 KA, and SI carried out the computational analysis. SI supervised the project. All authors  
526 contributed to writing the manuscript.

527

## 528 **Competing financial interests**

529 YKaneko is employed by Medical & Biological Laboratories, Co. (MBL, Tokyo, Japan).  
530 MBL imported the testing material used in this research. YKaneko participated in the testing  
531 process; however, he did not engage in the research design and analysis. YKobashi and MT  
532 received a research grant from Pfizer Health Research Foundation for research not associated  
533 with this work.

534

## 535 **Institutional review board statement**

536 This study was approved by the ethics committees of Hirata Central Hospital (number  
537 2021-0611-1) and Fukushima Medical University (number 2021-116). This study was conducted  
538 in accordance with the Code of Ethics of the World Medical Association (Declaration of Helsinki).

539

## 540 **Informed consent statement**

541 Informed consent was obtained from all subjects involved in the study.

542

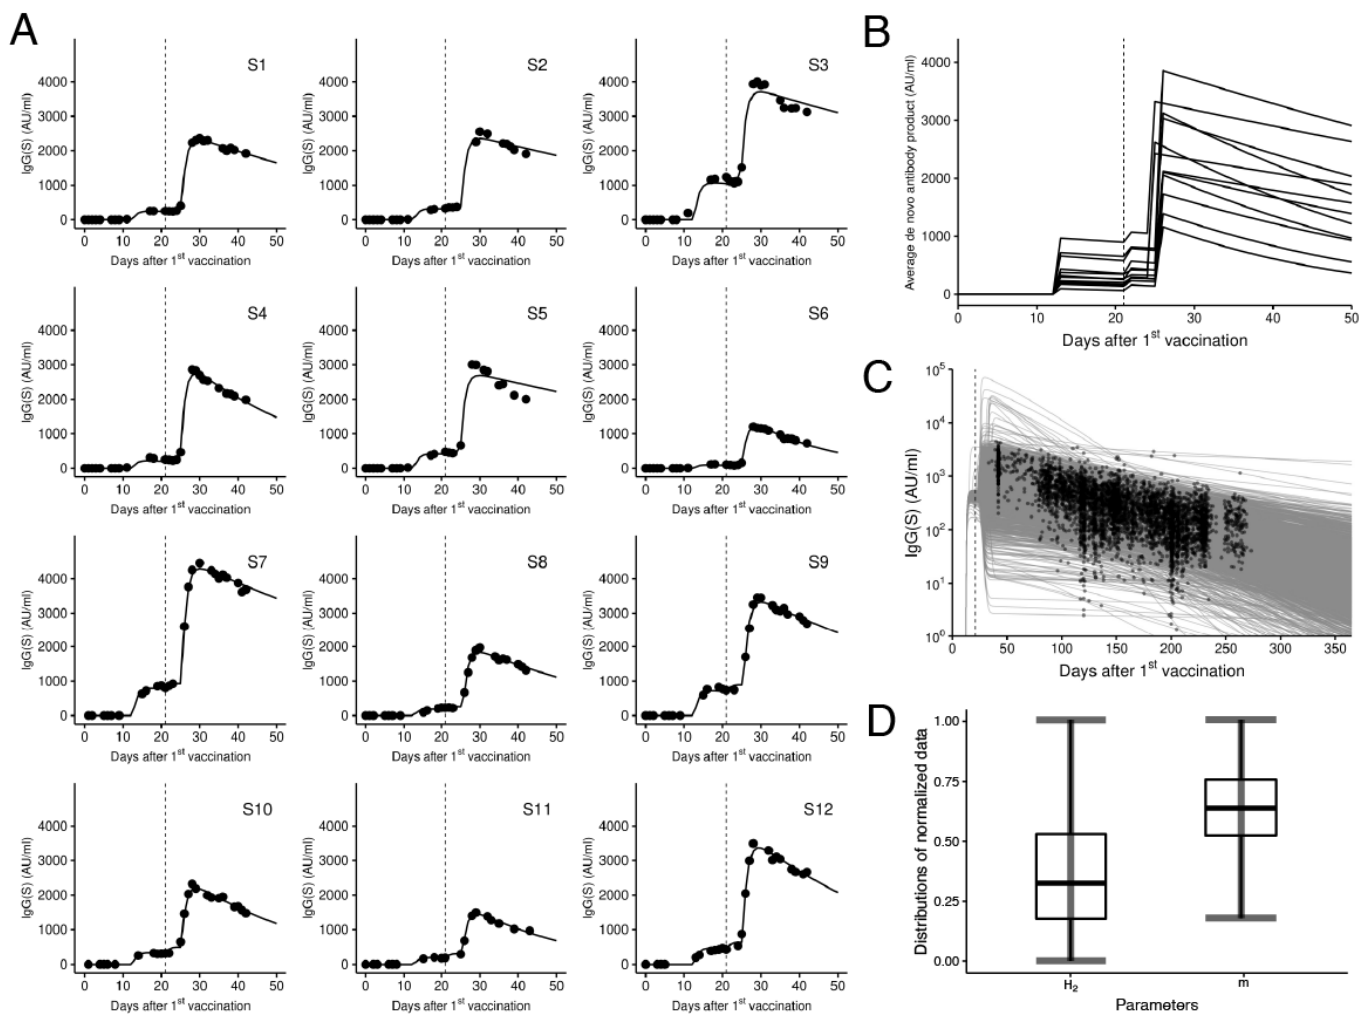

543 **Supplementary Figure 1 | Calibrating vaccine-elicited antibody dynamics: (A)** Observed and  
 544 best-fitted IgG(S) titers are described for the 12 health care workers (HCWs) whose serum was  
 545 sequentially sampled. The dashed vertical lines at day 21 correspond to the date of second  
 546 vaccination. **(B)** Time-course averages of *de novo* antibody response elicited by the first and  
 547 second vaccinations for the 12 HCWs are described. **(C)** Reconstructed individual antibody  
 548 dynamics for the 2,159 participants are represented along with the measured IgG(S). The black  
 549 circles correspond to the measurements of antibody titers at different time points. **(D)** Distributions  
 550 of the estimated parameter values (i.e.,  $H_2$  and  $m$ ) for 2,407 participants are plotted. Dataset for  
 551 each distribution is normalized by the value corresponding to the 95th percentile of data values,  
 552 and data whose values were larger than this value were removed to improve visibility of the figure.  
 553

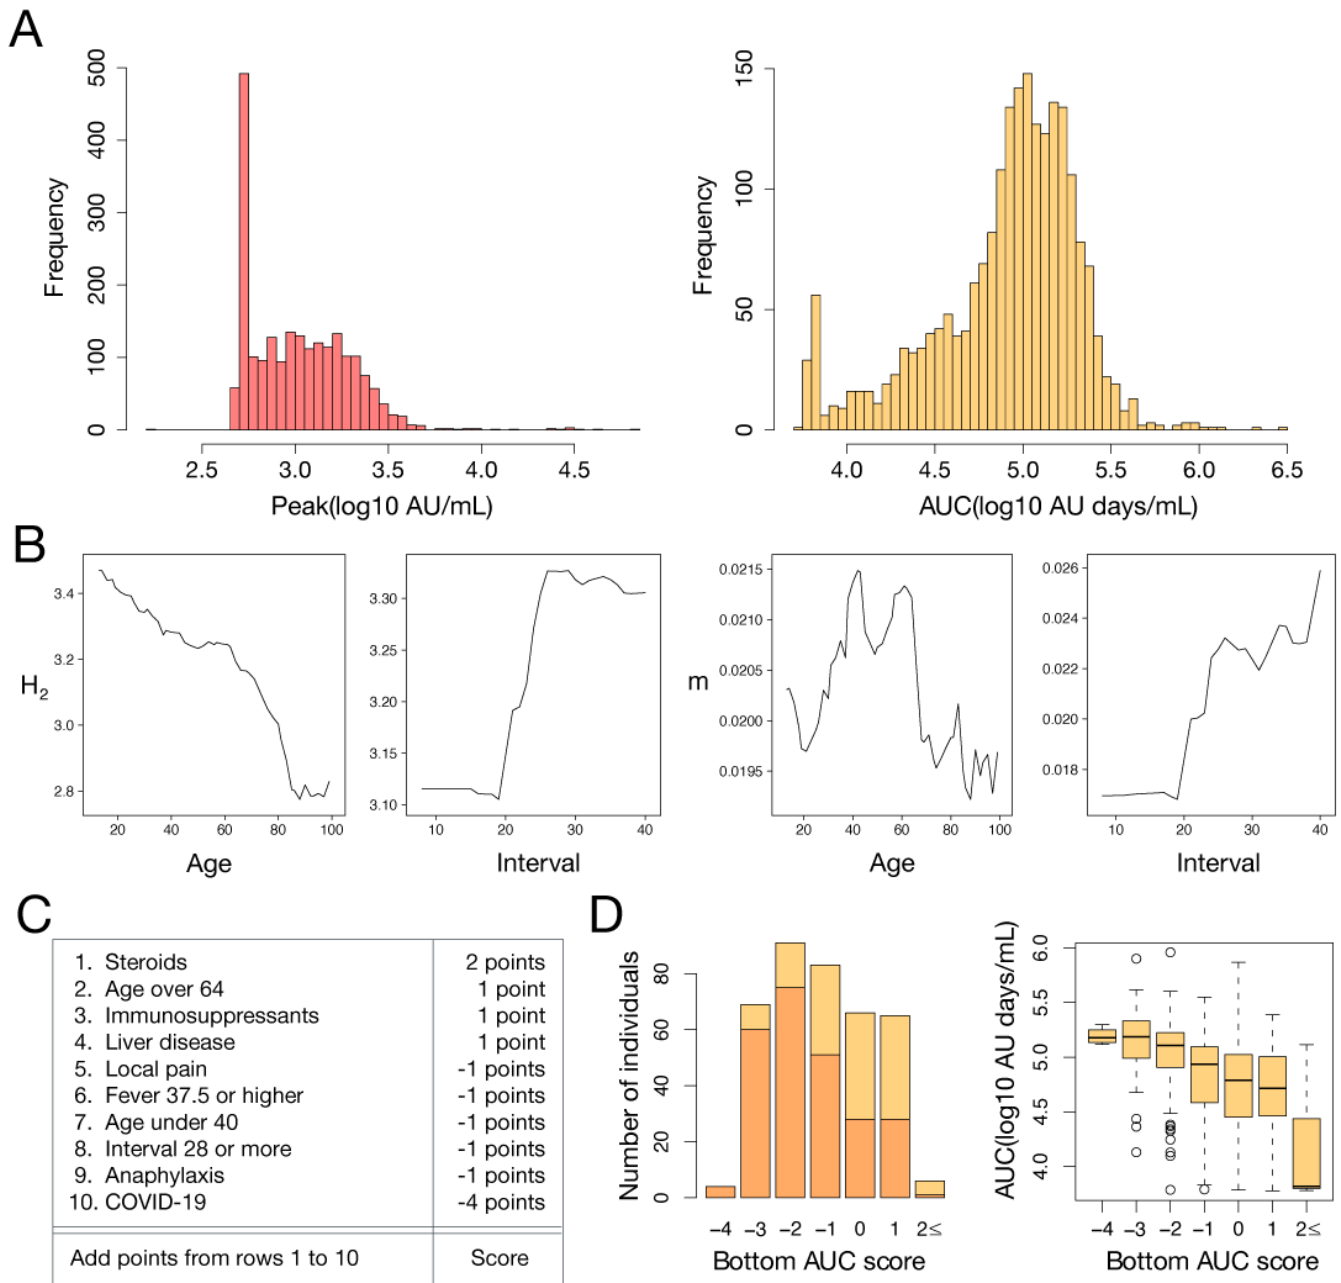

554

555 **Supplementary Figure 2 | Analyzing antibody titers: (A)** The distributions of two features of  
 556 antibody dynamics (peak and AUC) in the cohort are shown. **(B)** Partial dependence plots  
 557 showing the dependence of the two parameters ( $H_2$  and  $m$ ) on age or the interval are shown.  
 558 **(C)** The bottom AUC score to identify individuals with AUC in the bottom third of the population is  
 559 shown. **(D)** Left: The distribution of the bottom AUC score in the test dataset. 4, 69, 91, 83, 66,  
 560 65, and 6 individuals had scores of -4, -3, -2, -1, 0, 1, or 2 or more, respectively. Those in the  
 561 bottom third of the test dataset are shown in yellow, and those not in the bottom third are shown  
 562 in orange. The ratio of individuals with AUC in the bottom third of the test dataset increased as  
 563 the bottom AUC score increased. Right: the average AUC tended to decrease as the bottom AUC  
 564 score increased.

565

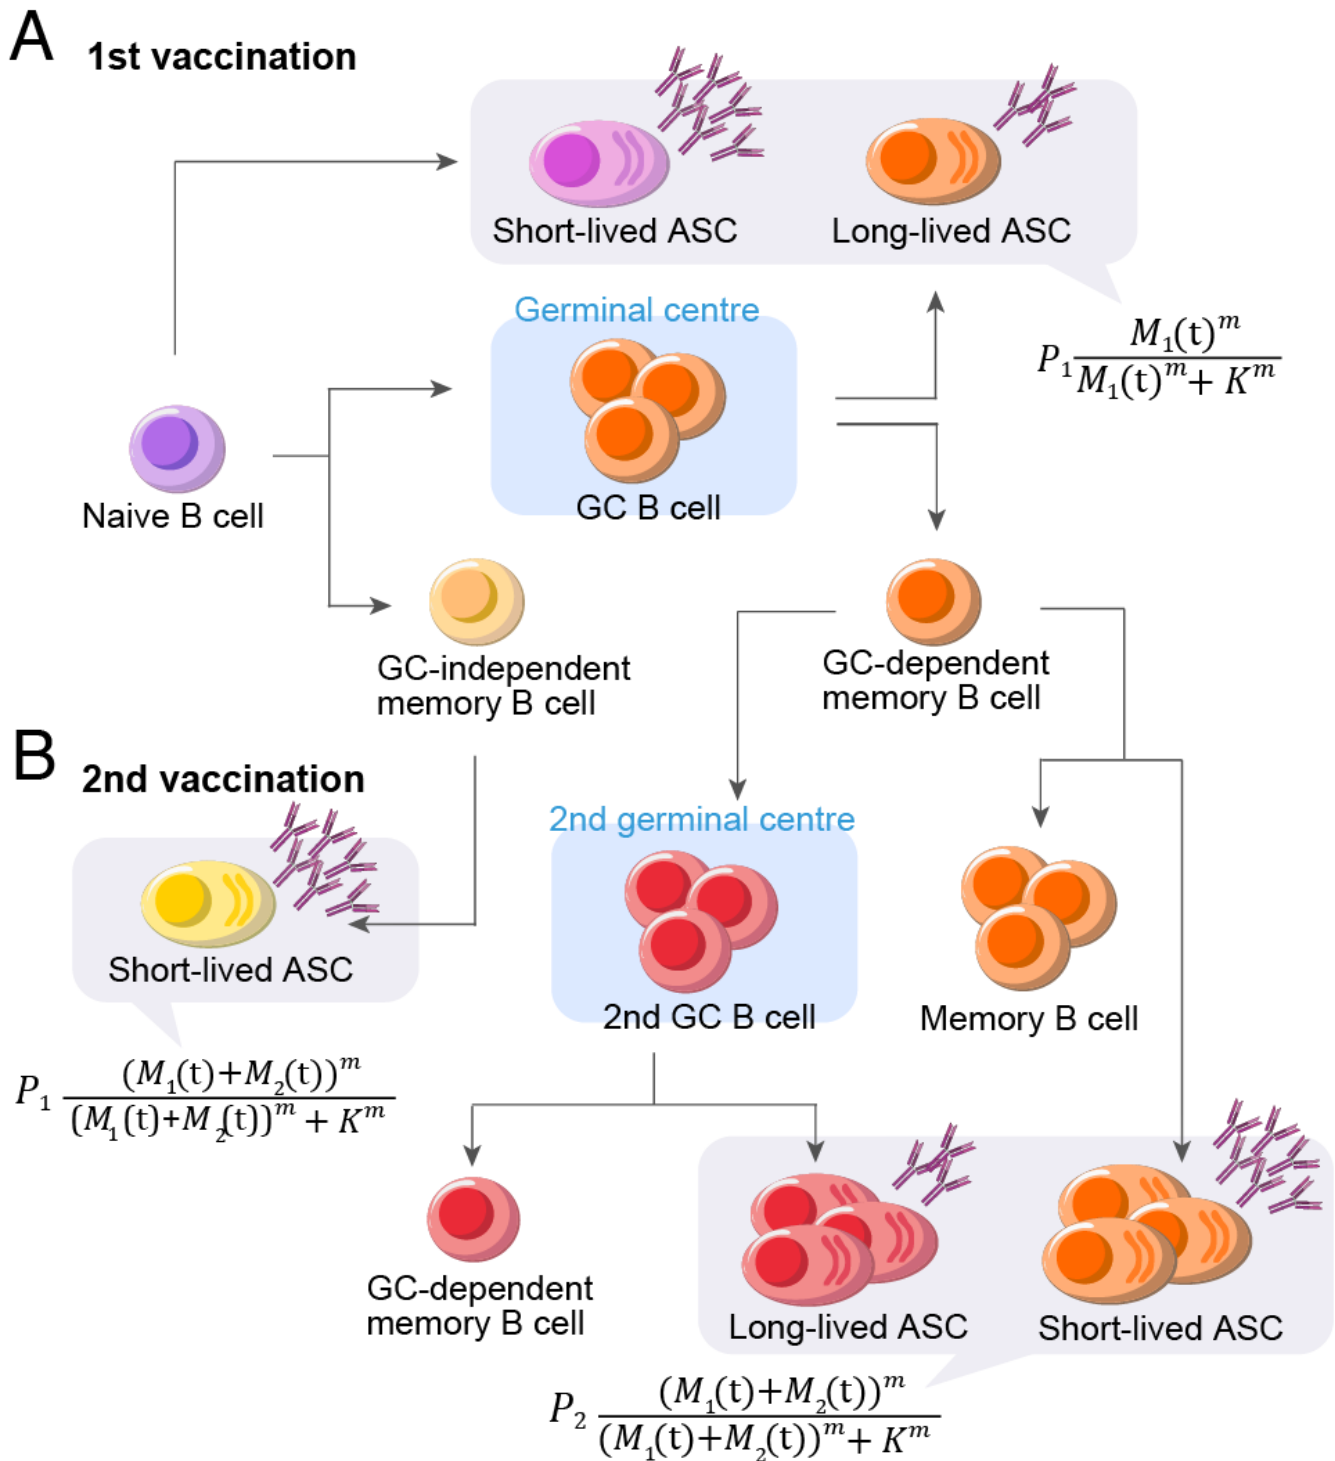

**Supplementary Figure 3 | Modeling vaccine-elicited B cell dynamics:** (A) First vaccination-elicited antibody-secreting cell and memory B cell inductions are described. Once naïve B cells encounter vaccine antigens outside the germinal center (GC), the activated naïve B cells differentiate into short-lived antibody-secreting cells (ASCs), plasmablasts, GC B cells, or GC-independent memory B cells depending on BCR affinity for their cognate antigen. Subsequently, the GC B cells undergo rapid proliferation with somatic immunoglobulin hypermutation and differentiate into GC-dependent memory B cells or long-lived antibody-secreting cells (plasma cells), with immunoglobulin class switching. Through the GC-independent and dependent

574 pathways, antibody-secreting cells (i.e.,  $B(t)$ ) are induced and they secrete antibodies (i.e.,  $A(t)$ ).  
575 **(B)** Second vaccination-elicited recall immune responses are described. After re-exposure to  
576 vaccine antigens, memory B cells rapidly reactivate and expand. Of activated memory B cells,  
577 while some differentiate into plasmablasts or memory B cells outside the GC, others enter the GC  
578 to be secondary GC B cells. These secondary GC B cells differentiate into GC-dependent memory  
579 B cells or plasma cells. In general, the secondary antibody responses are much faster and larger  
580 by an order of magnitude compared with the first vaccination-elicited antibody responses.

## Supplementary Table 1 | Basic demographics for the Fukushima vaccination cohort

| Characteristic                   | <40 years   | 40-64 years | >65 years   | Overall     | p-value |
|----------------------------------|-------------|-------------|-------------|-------------|---------|
| <b>Gender</b>                    |             |             |             |             | 0.001   |
| Male                             | 338(46.8)   | 421(38.2)   | 286(40.8)   | 1045(41.4)  |         |
| <b>Vaccine type</b>              |             |             |             |             | 0.015   |
| BNT162b2 (Pfizer–BioNTech)       | 651(90.0)   | 971(88.1)   | 649(92.6)   | 2271(89.9)  |         |
| mRNA-1273 (Moderna)              | 0(0.0)      | 3(0.3)      | 0(0.0)      | 3(0.1)      |         |
| <b>Days (mean [SD])</b>          |             |             |             |             |         |
| from 1st dose                    | 106.3[37.7] | 104.4[35.1] | 103.8[17.2] | 104.8[32.0] | 0.302   |
| from 2nd dose                    | 181.4[37.5] | 180.1[35.7] | 180.1[16.9] | 180.5[32.2] | 0.292   |
| <b>Blood type</b>                |             |             |             |             |         |
| A                                | 239(35.7)   | 427(39.0)   | 212(35.4)   | 878(37.2)   | <0.001  |
| B                                | 151(22.6)   | 236(21.6)   | 140(23.4)   | 527(22.3)   | <0.001  |
| O                                | 213(31.8)   | 326(29.8)   | 172(28.7)   | 711(30.1)   | 0.367   |
| AB                               | 66(9.9)     | 105(9.6)    | 75(12.5)    | 246(10.4)   | 0.432   |
| <b>BCG history</b>               | 560(83.5)   | 907(83.1)   | 412(61.9)   | 1879(77.4)  | 0.395   |
| <b>Smoking</b>                   | 144(19.9)   | 253(23.0)   | 63(9.0)     | 460(18.2)   | <0.001  |
| <b>Drinking Habit</b>            |             |             |             |             | <0.001  |
| Almost not                       | 403(55.7)   | 542(49.2)   | 458(65.3)   | 1403(55.5)  |         |
| Occasionally                     | 247(34.2)   | 310(28.1)   | 90(12.8)    | 647(25.6)   |         |
| Everyday                         | 63(8.7)     | 222(20.2)   | 127(18.1)   | 412(16.3)   |         |
| <b>Daily Alcohol Consumption</b> |             |             |             |             | <0.001  |
| <20g                             | 322(44.5)   | 382(34.7)   | 176(25.1)   | 880(34.8)   |         |
| 20-40g                           | 108(14.9)   | 214(19.4)   | 87(12.4)    | 409(16.2)   |         |
| 40-60g                           | 20(2.8)     | 60(5.4)     | 20(2.9)     | 100(4.0)    |         |
| >60g                             | 5(0.7)      | 13(1.2)     | 2(0.3)      | 20(0.8)     |         |
| <b>Comorbidities</b>             |             |             |             |             |         |
| Hypertension                     | 8(1.1)      | 237(21.5)   | 432(61.6)   | 677(26.8)   | <0.001  |
| Dyslipidemia                     | 12(1.7)     | 123(11.2)   | 146(20.8)   | 281(11.1)   | <0.001  |
| Heart disease                    | 14(1.9)     | 47(4.3)     | 140(20.0)   | 201(8.0)    | <0.001  |
| Diabetes                         | 6(0.8)      | 72(6.5)     | 110(15.7)   | 188(7.4)    | <0.001  |
| Allergic disease                 | 69(9.5)     | 95(8.6)     | 21(3.0)     | 185(7.3)    | <0.001  |
| Asthma                           | 49(6.8)     | 45(4.1)     | 28(4.0)     | 122(4.8)    | 0.079   |
| Liver disease                    | 11(1.5)     | 45(4.1)     | 58(8.3)     | 114(4.5)    | <0.001  |
| Cancer                           | 3(0.4)      | 35(3.2)     | 46(6.6)     | 84(3.3)     | <0.001  |
| Gout                             | 5(0.7)      | 45(4.1)     | 26(3.7)     | 76(3.0)     | 0.001   |
| Thyroid disease                  | 8(1.1)      | 40(3.6)     | 11(1.6)     | 59(2.3)     | 0.005   |
| Lung disease                     | 12(1.7)     | 11(1.0)     | 28(4.0)     | 51(2.0)     | <0.001  |
| Mental disease                   | 17(2.4)     | 16(1.5)     | 13(1.9)     | 46(1.8)     | 0.739   |
| Rheumatism                       | 2(0.3)      | 16(1.5)     | 19(2.7)     | 37(1.5)     | 0.006   |
| Kidney disease                   | 6(0.8)      | 7(0.6)      | 14(2.0)     | 27(1.1)     | 0.089   |
| Anaphylaxis                      | 6(0.8)      | 7(0.6)      | 5(0.7)      | 18(0.7)     | 0.994   |
| Collagen disease                 | 4(0.6)      | 6(0.5)      | 5(0.7)      | 15(0.6)     | 0.993   |
| COVID-19 (family)                | 4(0.6)      | 5(0.5)      | 1(0.1)      | 10(0.4)     | 0.793   |
| COVID-19                         | 0(0.0)      | 3(0.3)      | 4(0.6)      | 7(0.3)      | 0.38    |
| Immune deficiency                | 2(0.3)      | 4(0.4)      | 0(0.0)      | 6(0.2)      | 0.654   |
| Others                           | 51(7.1)     | 147(13.3)   | 189(27.0)   | 387(15.3)   | <0.001  |
| <b>Drug</b>                      |             |             |             |             |         |
| Steroid                          | 9(1.2)      | 23(2.1)     | 26(3.7)     | 58(2.3)     | 0.002   |
| NSAIDs                           | 31(4.3)     | 78(7.1)     | 82(11.7)    | 191(7.6)    | <0.001  |
| Acetaminophen                    | 8(1.1)      | 22(2.0)     | 30(4.3)     | 60(2.4)     | <0.001  |
| Antihistamine                    | 46(6.4)     | 65(5.9)     | 43(6.1)     | 154(6.1)    | 0.367   |
| Immunosuppressants               | 6(0.8)      | 10(0.9)     | 8(1.1)      | 24(1.0)     | 0.432   |
| Biologics                        | 2(0.3)      | 5(0.5)      | 4(0.6)      | 11(0.4)     | 0.395   |
| Anti-cancer agent                | 0(0.0)      | 5(0.5)      | 5(0.7)      | 10(0.4)     | 0.292   |

| <b>Adverse Reaction</b>        |           |           |           |            |        |
|--------------------------------|-----------|-----------|-----------|------------|--------|
| Local pain                     | 515(71.2) | 684(62.1) | 228(32.5) | 1427(56.5) | <0.001 |
| Fatigue                        | 511(70.7) | 627(56.9) | 119(17.0) | 1257(49.8) | <0.001 |
| Joint pain                     | 327(45.2) | 354(32.1) | 90(2.8)   | 771(30.5)  | <0.001 |
| Fever (37.5 degrees or higher) | 370(51.2) | 308(28.0) | 41(5.9)   | 719(28.5)  | <0.001 |
| Headache                       | 321(44.4) | 331(30.0) | 34(4.9)   | 686(27.2)  | <0.001 |
| Fever (under 37.5 degrees)     | 137(19.0) | 209(19.0) | 40(5.7)   | 386(15.3)  | <0.001 |
| Dizziness                      | 57(7.9)   | 45(4.1)   | 9(1.3)    | 111(4.4)   | <0.001 |
| Nausea                         | 51(7.1)   | 41(3.7)   | 6(0.9)    | 98(3.9)    | <0.001 |
| Diarrhea                       | 30(4.2)   | 25(2.3)   | 3(0.4)    | 58(2.3)    | <0.001 |
| Others                         | 40(5.5)   | 69(6.3)   | 16(2.3)   | 125(5.0)   | 0.003  |

Values are No. (%) unless noted otherwise. BCG, bacille Calmette-Guérin; NSAID, nonsteroidal anti-inflammatory drug.

**Supplementary Table 2. Estimated fixed and individual parameters for 12 health care workers**

| <b>Parameter or variable</b>                                                       | Decay rate of antibody-secreting cells | Maximum <i>de novo</i> production of antibody by 1 <sup>st</sup> vaccination | Delay of induction of antibody-secreting cells after 1 <sup>st</sup> vaccination | Steepness at which induction increases with increasing amount of mRNA | Amount of mRNA satisfying $P_i/2$ | Maximum <i>de novo</i> production of antibody by 2 <sup>nd</sup> vaccination | Delay of induction of antibody-secreting cells after 2 <sup>nd</sup> vaccination |
|------------------------------------------------------------------------------------|----------------------------------------|------------------------------------------------------------------------------|----------------------------------------------------------------------------------|-----------------------------------------------------------------------|-----------------------------------|------------------------------------------------------------------------------|----------------------------------------------------------------------------------|
| <b>Symbol</b>                                                                      | $\mu$                                  | $H_1$                                                                        | $\eta_1$                                                                         | $m$                                                                   | $K$                               | $H_2$                                                                        | $\eta_2$                                                                         |
| <b>Unit</b>                                                                        | day <sup>-1</sup>                      | AU/mL                                                                        | day                                                                              | ---                                                                   | $\mu\text{g}/0.5\text{mL}$        | AU/mL                                                                        | day                                                                              |
| <b>Individual estimated parameters for <math>S_1</math> to <math>S_{12}</math></b> |                                        |                                                                              |                                                                                  |                                                                       |                                   |                                                                              |                                                                                  |
| $S_1$                                                                              | 0.885346                               | 650.518                                                                      | 12.5269                                                                          | 0.0373144                                                             | 33900                             | 5227.34                                                                      | 4.21433                                                                          |
| $S_2$                                                                              | 0.885346                               | 760.114                                                                      | 12.5109                                                                          | 0.028673                                                              | 33900                             | 5035.79                                                                      | 4.23423                                                                          |
| $S_3$                                                                              | 0.885346                               | 2375.11                                                                      | 12.5096                                                                          | 0.0223842                                                             | 33900                             | 7562.82                                                                      | 3.85759                                                                          |
| $S_4$                                                                              | 0.885346                               | 790.745                                                                      | 12.4927                                                                          | 0.0611514                                                             | 33900                             | 7304.66                                                                      | 3.95306                                                                          |
| $S_5$                                                                              | 0.885346                               | 942.686                                                                      | 12.5169                                                                          | 0.0250174                                                             | 33900                             | 5638.12                                                                      | 3.91276                                                                          |
| $S_6$                                                                              | 0.885346                               | 448.87                                                                       | 12.5243                                                                          | 0.0851651                                                             | 33900                             | 3828.1                                                                       | 4.24752                                                                          |
| $S_7$                                                                              | 0.885346                               | 1848.01                                                                      | 12.5471                                                                          | 0.0272096                                                             | 33900                             | 9073.94                                                                      | 4.2513                                                                           |
| $S_8$                                                                              | 0.885346                               | 567.839                                                                      | 12.5409                                                                          | 0.0523284                                                             | 33900                             | 4673.2                                                                       | 4.71178                                                                          |
| $S_9$                                                                              | 0.885346                               | 1835.9                                                                       | 12.5428                                                                          | 0.0365247                                                             | 33900                             | 7517.48                                                                      | 4.59114                                                                          |
| $S_{10}$                                                                           | 0.885346                               | 1201.77                                                                      | 12.5109                                                                          | 0.0625655                                                             | 33900                             | 5916.28                                                                      | 4.17894                                                                          |
| $S_{11}$                                                                           | 0.885346                               | 736.229                                                                      | 12.5086                                                                          | 0.0700219                                                             | 33900                             | 4118.67                                                                      | 4.54006                                                                          |
| $S_{12}$                                                                           | 0.885346                               | 1369.65                                                                      | 12.5409                                                                          | 0.0488345                                                             | 33900                             | 8226.08                                                                      | 4.23969                                                                          |
| <b>Population estimated parameters</b>                                             |                                        |                                                                              |                                                                                  |                                                                       |                                   |                                                                              |                                                                                  |
| ---                                                                                | 0.885346                               | 975.297                                                                      | 12.52                                                                            | 0.0437653                                                             | 33900                             | 6035.142                                                                     | 4.25                                                                             |



**A**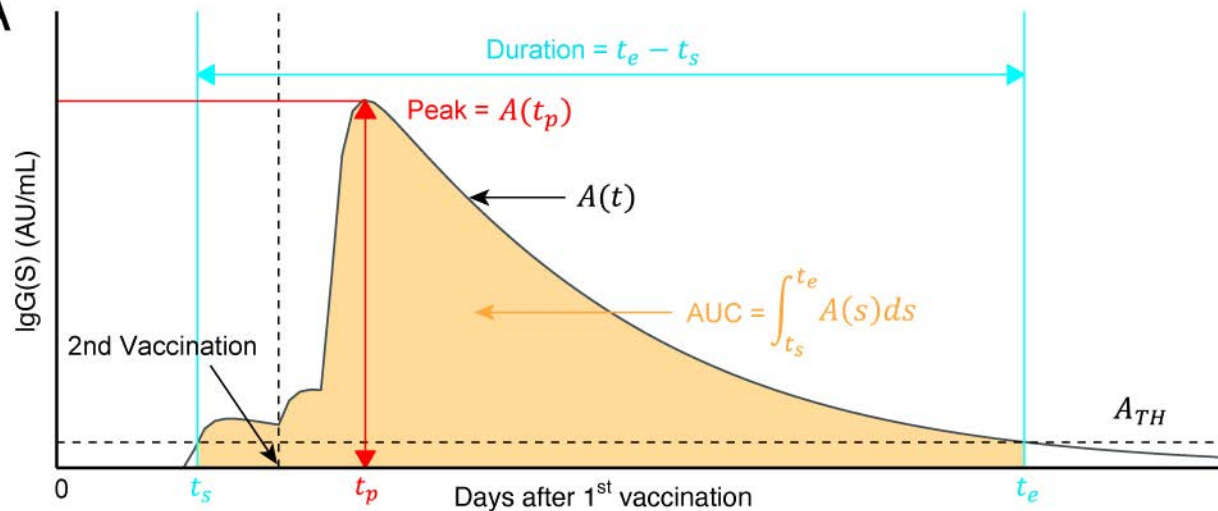**B**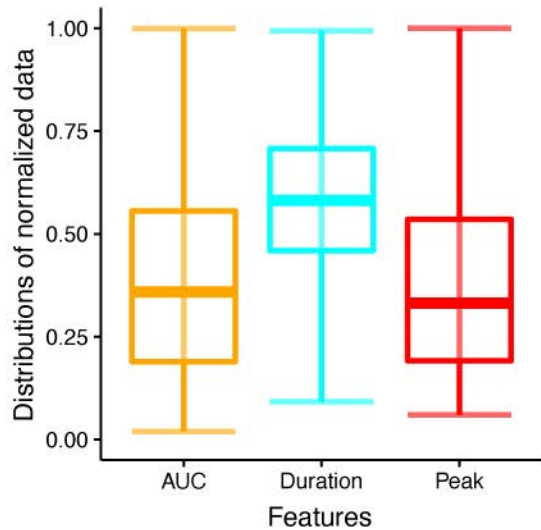**C**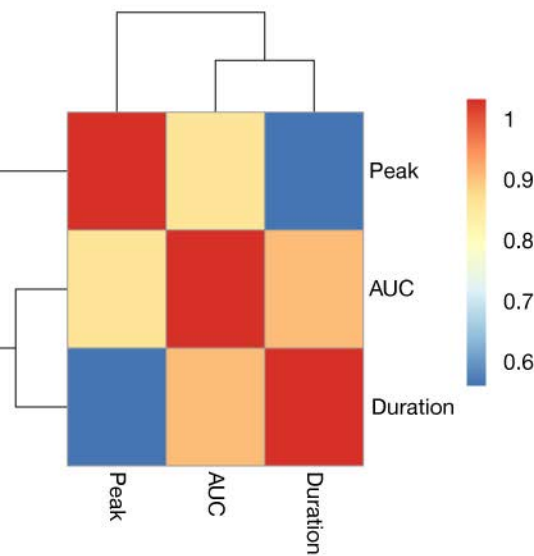

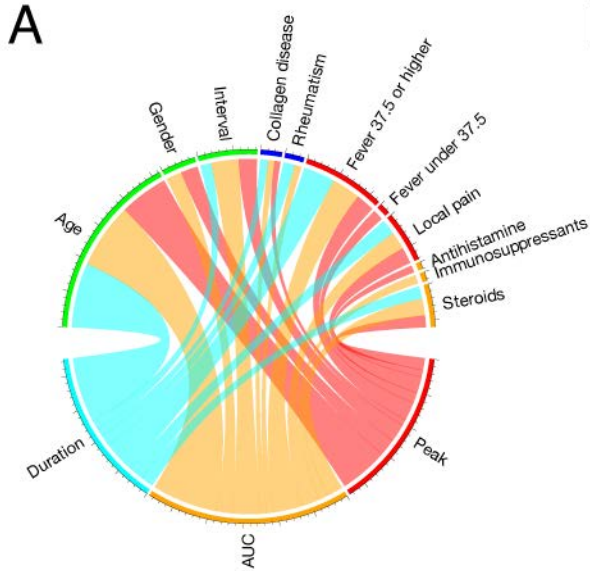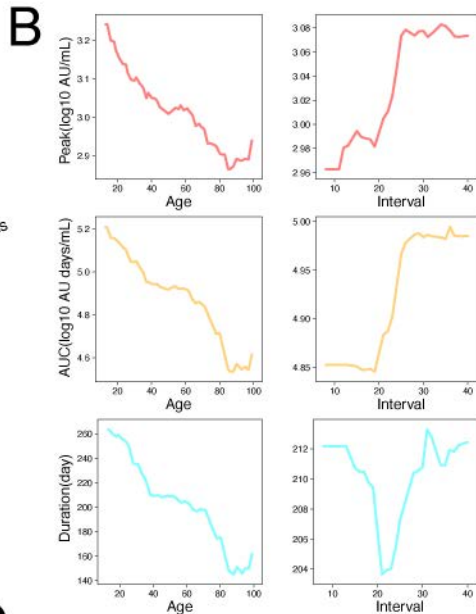

**C**

|                              |           |
|------------------------------|-----------|
| 1. COVID-19                  | 5 points  |
| 2. Fever 37.5 or higher      | 1 point   |
| 3. Age under 40              | 1 point   |
| 4. Dyslipidemia              | 1 point   |
| 5. Age over 64               | -1 points |
| 6. Steroids                  | -1 points |
| 7. Diabetes                  | -1 points |
| 8. Liver disease             | -1 points |
| 9. Collagen disease          | -5 points |
| 10. Immune deficiency        | -5 points |
| Add points from rows 1 to 10 | Score     |

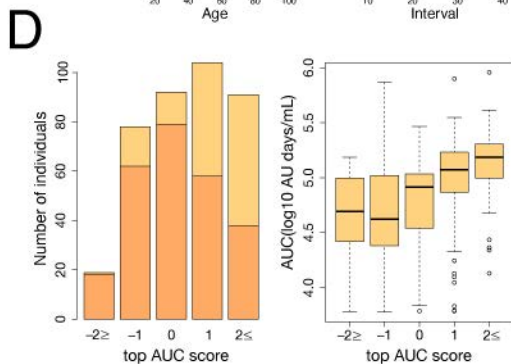

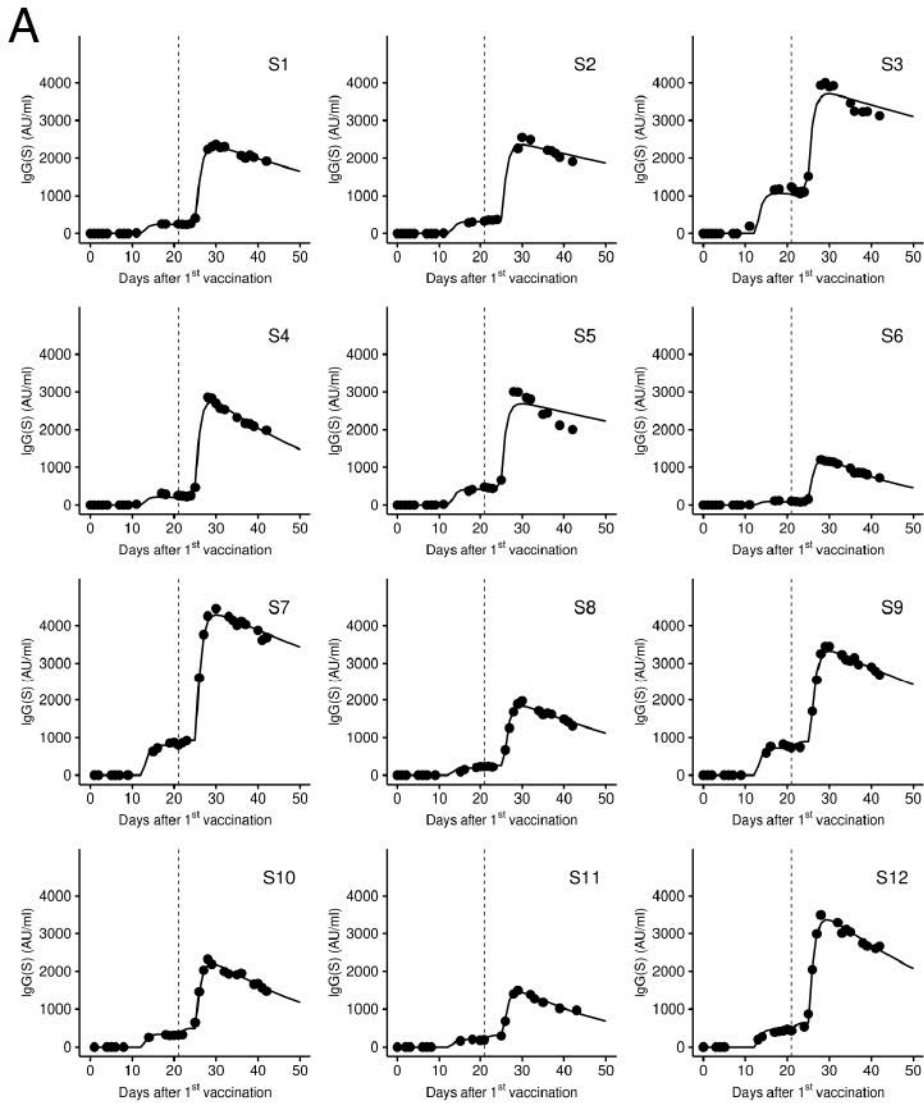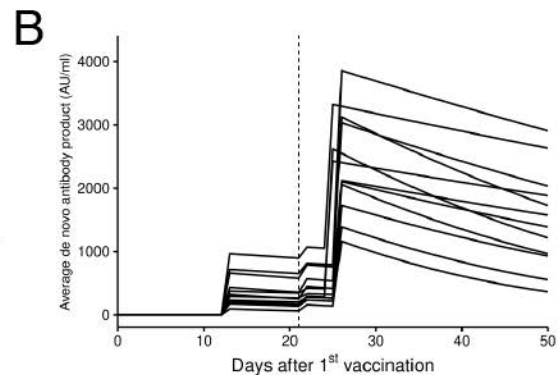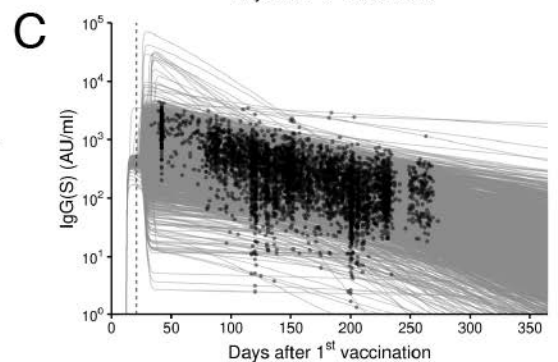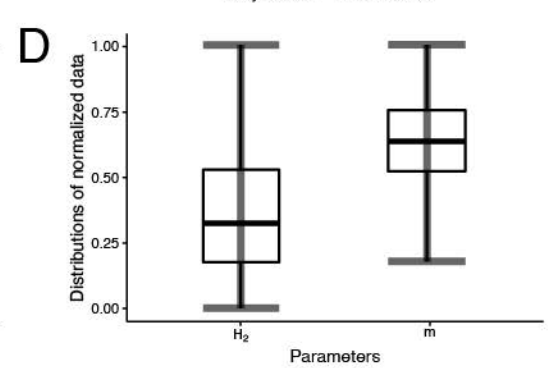

**A**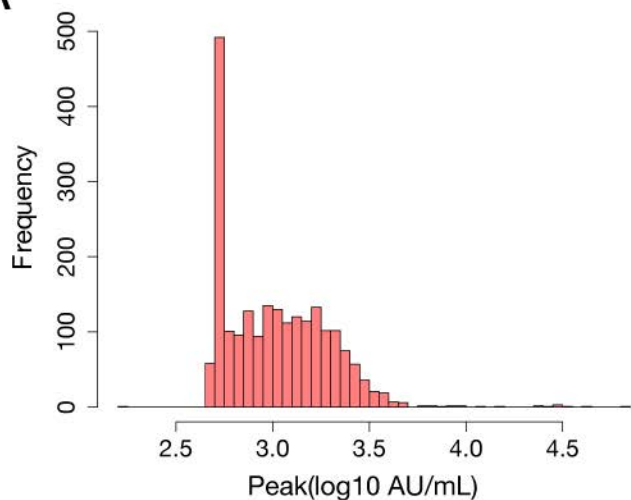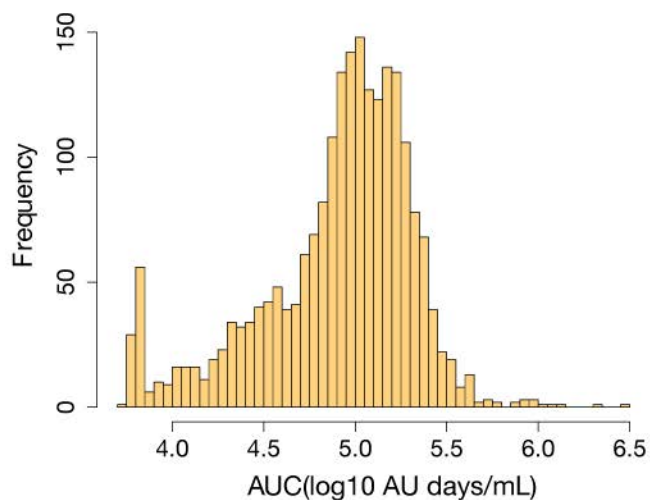**B**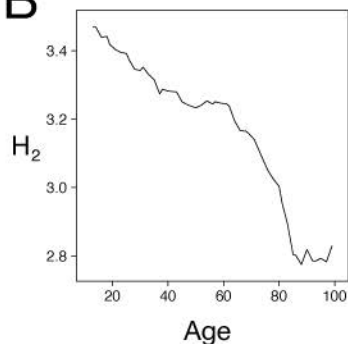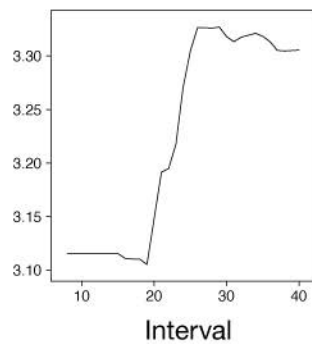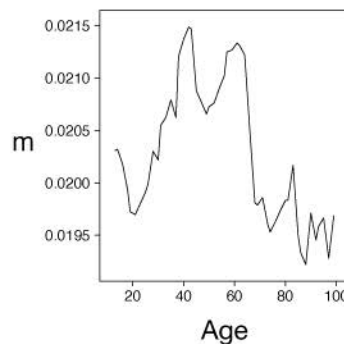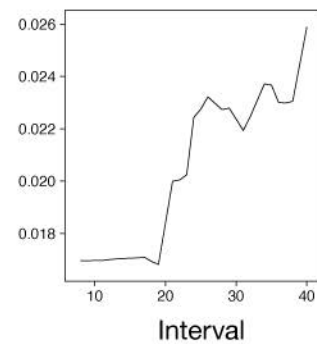**C**

|                              |           |
|------------------------------|-----------|
| 1. Steroids                  | 2 points  |
| 2. Age over 64               | 1 point   |
| 3. Immunosuppressants        | 1 point   |
| 4. Liver disease             | 1 point   |
| 5. Local pain                | -1 points |
| 6. Fever 37.5 or higher      | -1 points |
| 7. Age under 40              | -1 points |
| 8. Interval 28 or more       | -1 points |
| 9. Anaphylaxis               | -1 points |
| 10. COVID-19                 | -4 points |
| Add points from rows 1 to 10 | Score     |

**D**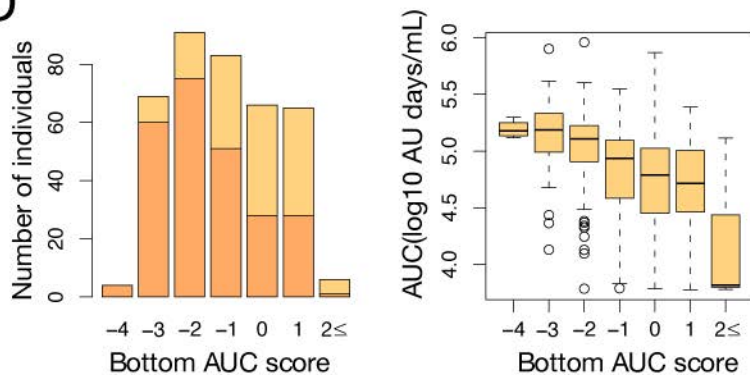

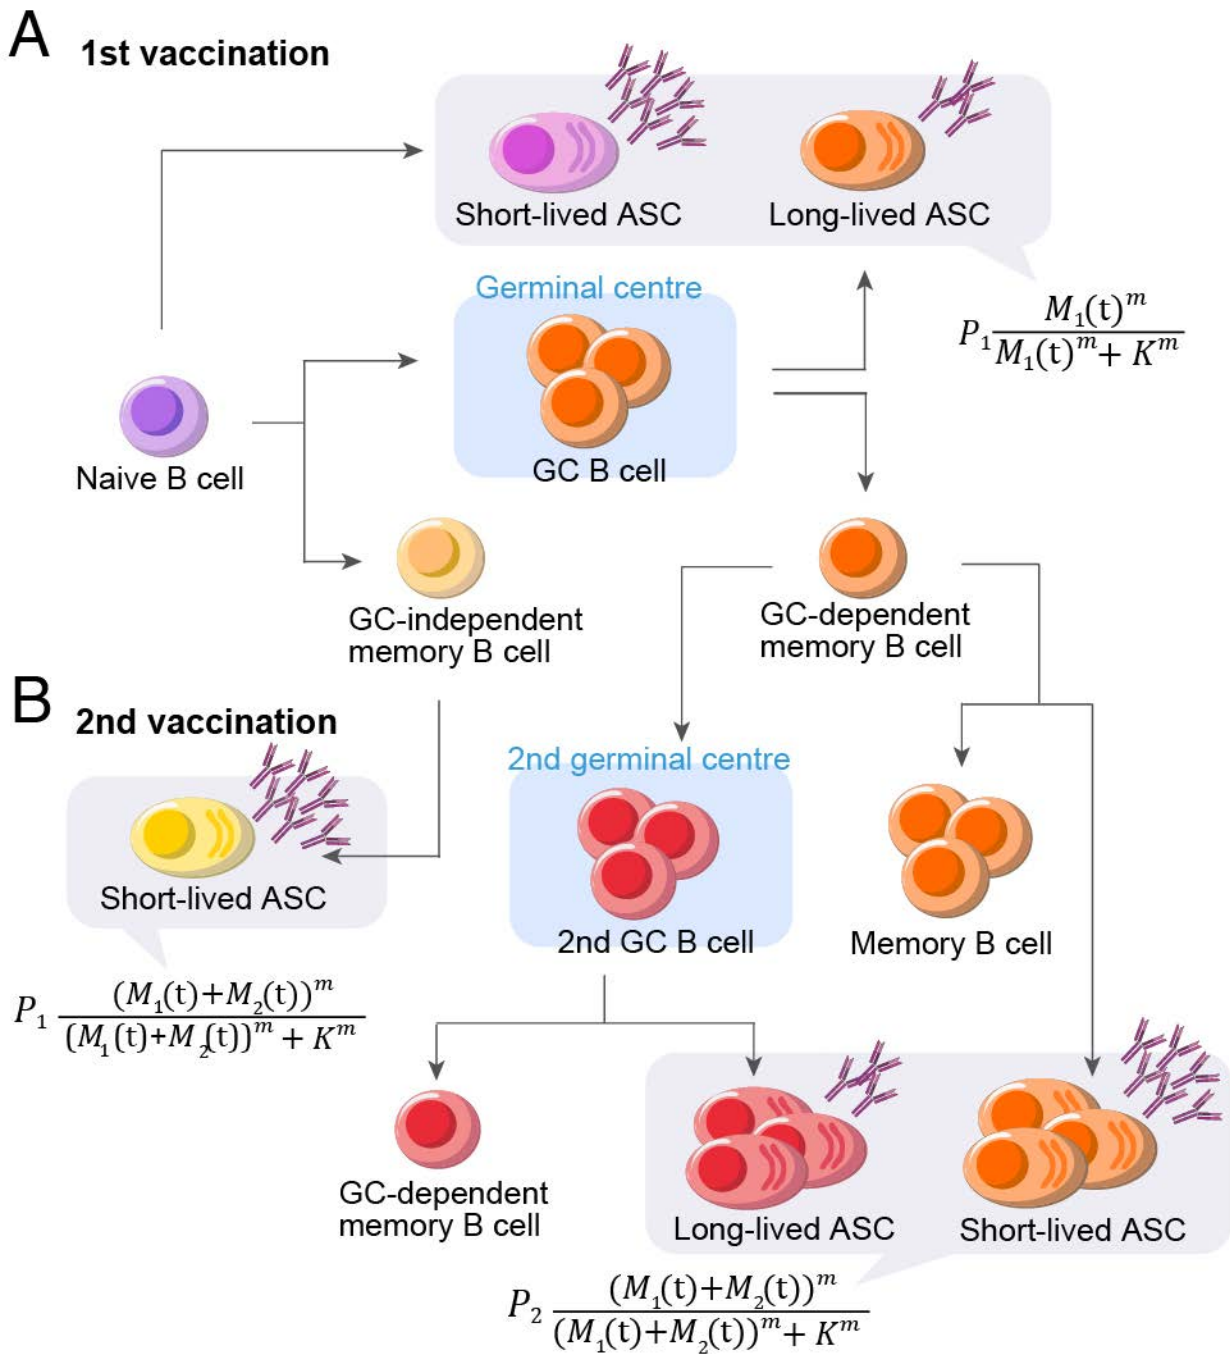

Source: https://medrxiv.org/content/medrxiv/early/2022/07/06/2022.07.05.22277283.full.pdf
